# Supplementary material for: Fluorinated and Non-Fluorinated 1,4-Diarylpyrazoles via MnO2-Mediated Mechanochemical Deacylative Oxidation of 5-Acylpyrazolines
Source: MDPI journal article supplement (doi:10.3390/molecules27238446), 2022-12-02
Supplement: s1 [file s1]

## Supporting Information

for

### Fluorinated and non-fluorinated 1,4-diarylpirazoles via MnO<sub>2</sub>-mediated mechanochemical deacylative oxidation of 5-acylpirazolines

Greta Utecht-Jarzyńska,<sup>a</sup> Anna Kowalczyk,<sup>a,b</sup> Marcin Jasiński<sup>a,\*</sup>

<sup>a</sup> *Faculty of Chemistry, University of Lodz, Tamka 12, 91403 Łódź, Poland*

<sup>b</sup> *The University of Lodz Doctoral School of Exact and Natural Sciences, Banacha 12/16, 90237 Łódź, Poland*

\* Corresponding author: Marcin Jasiński – *University of Lodz, Faculty of Chemistry, Łódź, Poland;*

<https://orcid.org/0000-0002-8789-9690>;

Phone: +48-42-635 5766;

Email: mjasinski@uni.lodz.pl

#### Content

|                                                                           |     |
|---------------------------------------------------------------------------|-----|
| Copies of <sup>1</sup> H and <sup>13</sup> C NMR spectra of new compounds | S2  |
| Copies of <sup>19</sup> F NMR spectra of new pyrazolines and pyrazoles    | S22 |

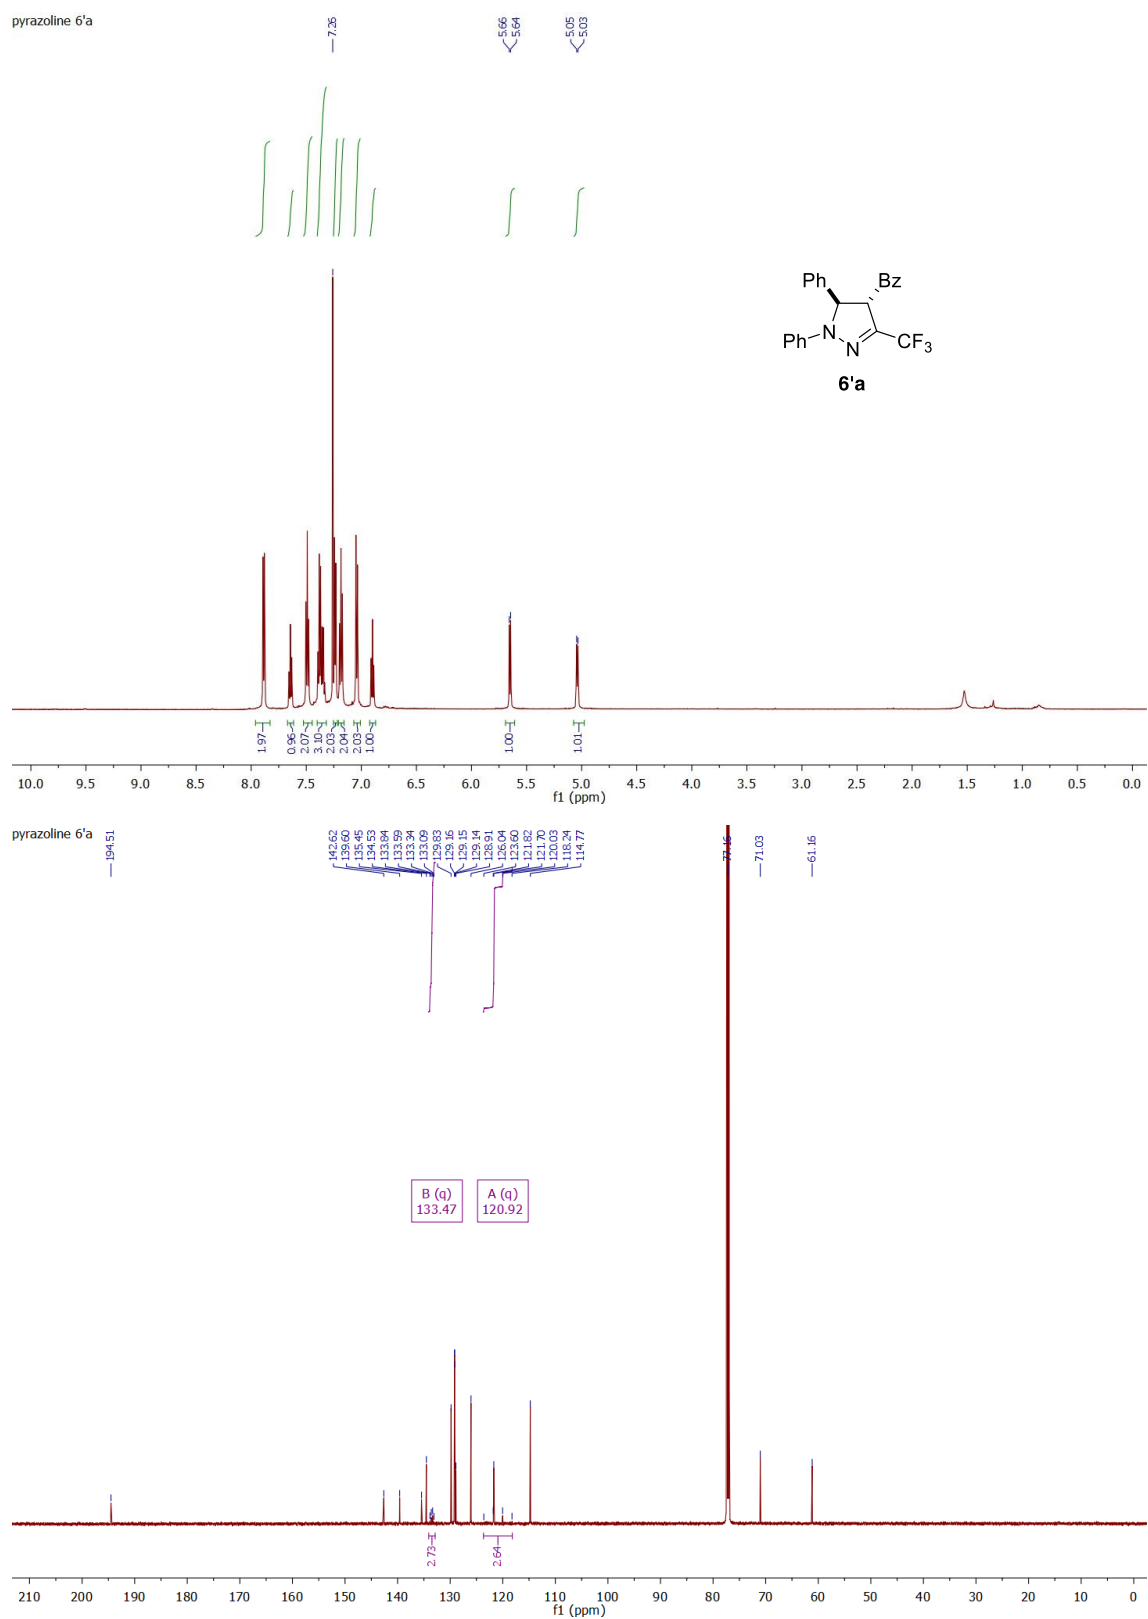

**Figure S1.** <sup>1</sup>H NMR (600 MHz, CDCl<sub>3</sub>) and <sup>13</sup>C NMR (151 MHz, CDCl<sub>3</sub>) spectra for compound **6'a**.

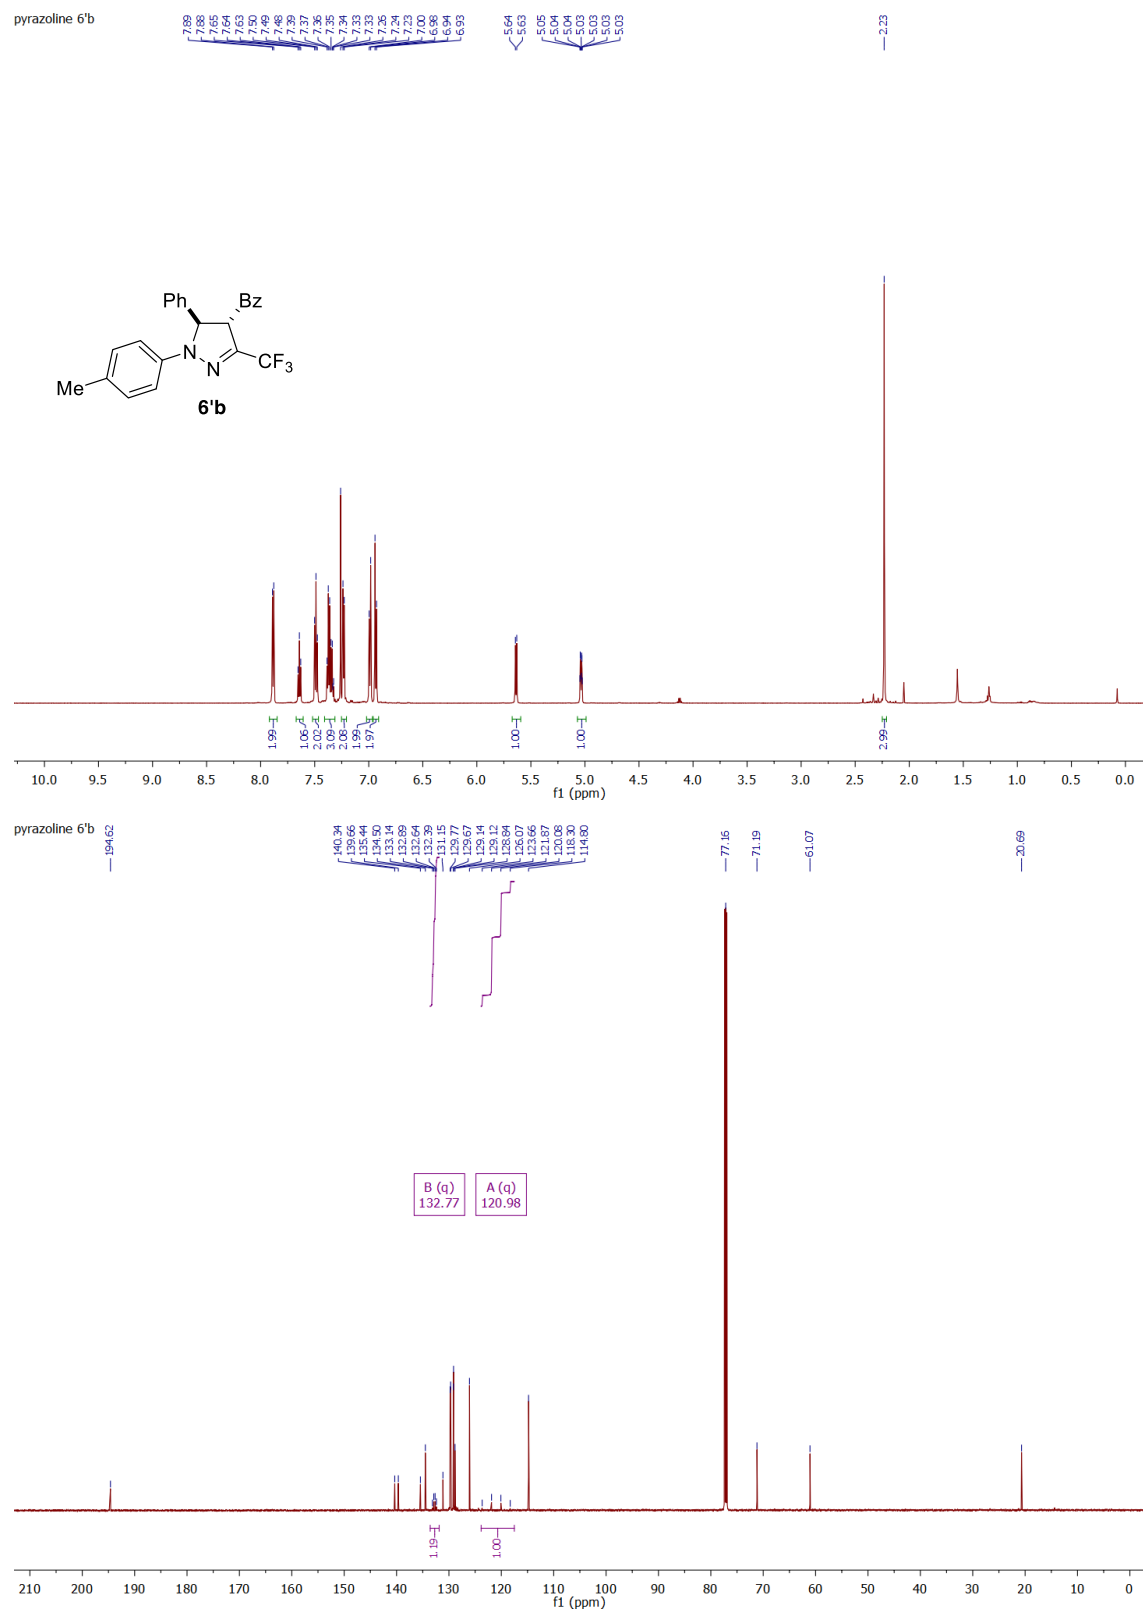

**Figure S2.** <sup>1</sup>H NMR (600 MHz, CDCl<sub>3</sub>) and <sup>13</sup>C NMR (151 MHz, CDCl<sub>3</sub>) spectra for compound 6'b.

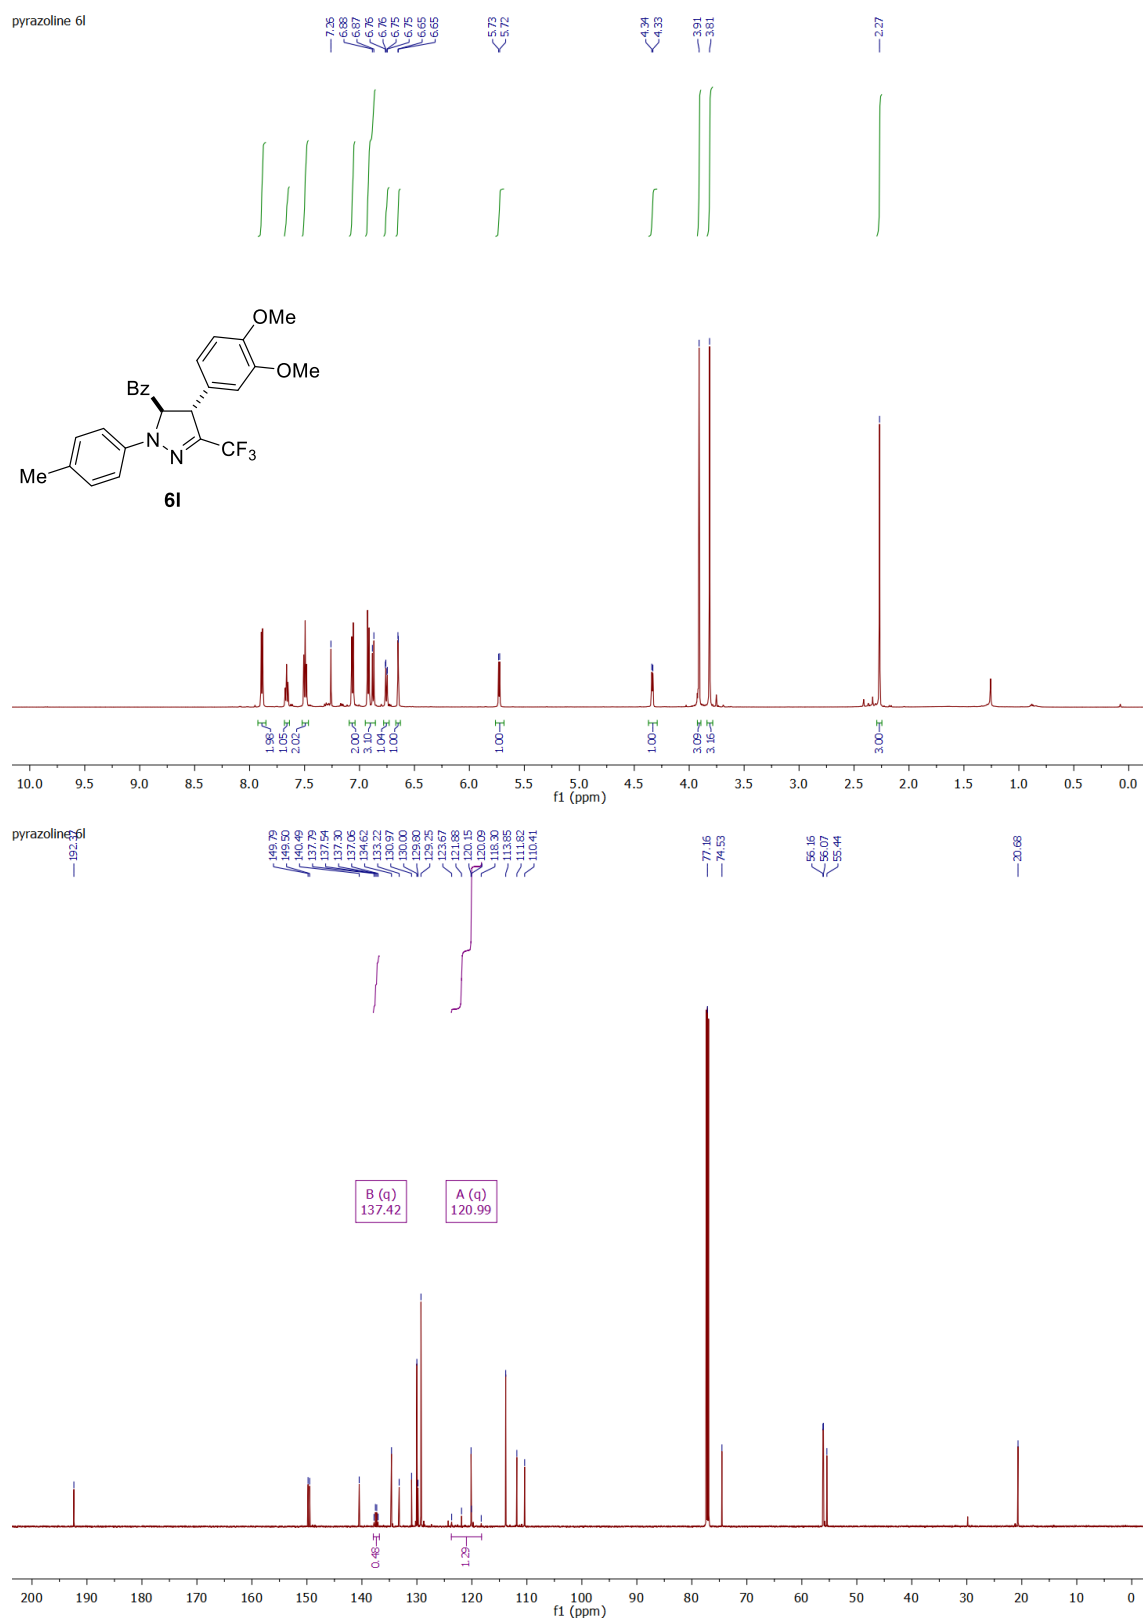

**Figure S3.** <sup>1</sup>H NMR (600 MHz, CDCl<sub>3</sub>) and <sup>13</sup>C NMR (151 MHz, CDCl<sub>3</sub>) spectra for compound 6l.

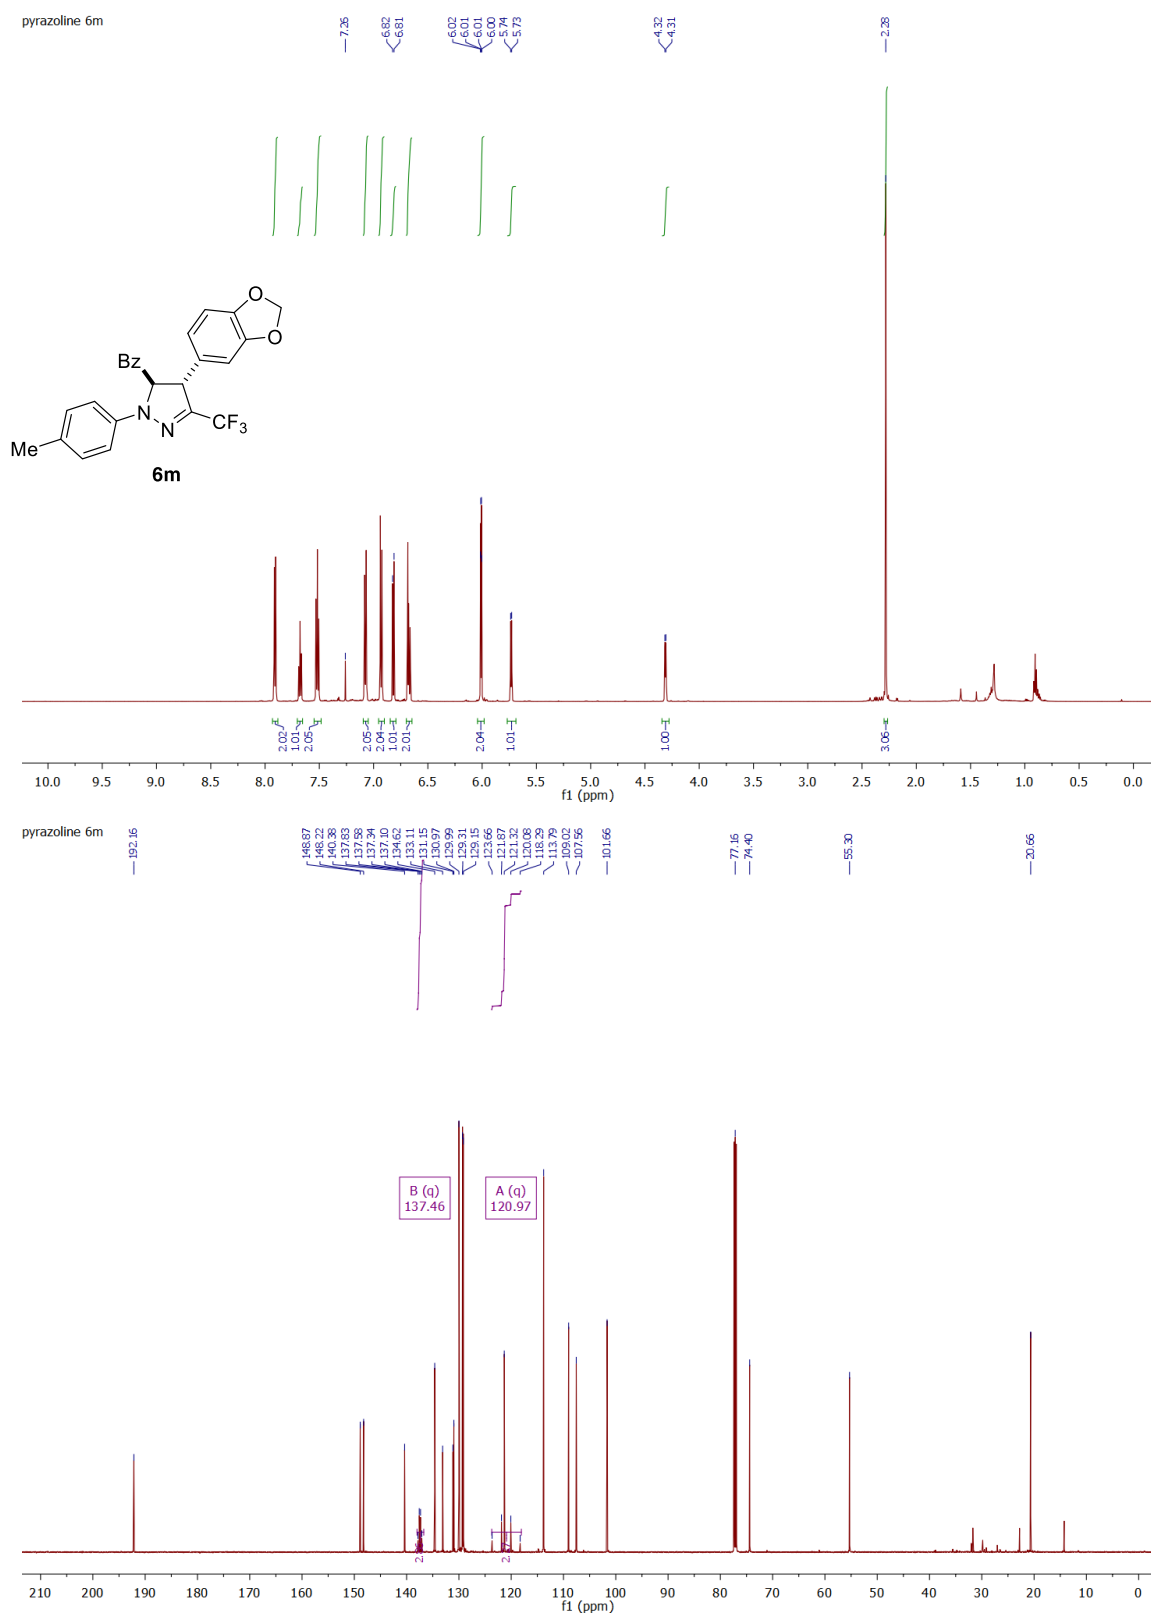

**Figure S4.** <sup>1</sup>H NMR (600 MHz, CDCl<sub>3</sub>) and <sup>13</sup>C NMR (151 MHz, CDCl<sub>3</sub>) spectra for compound **6m**.

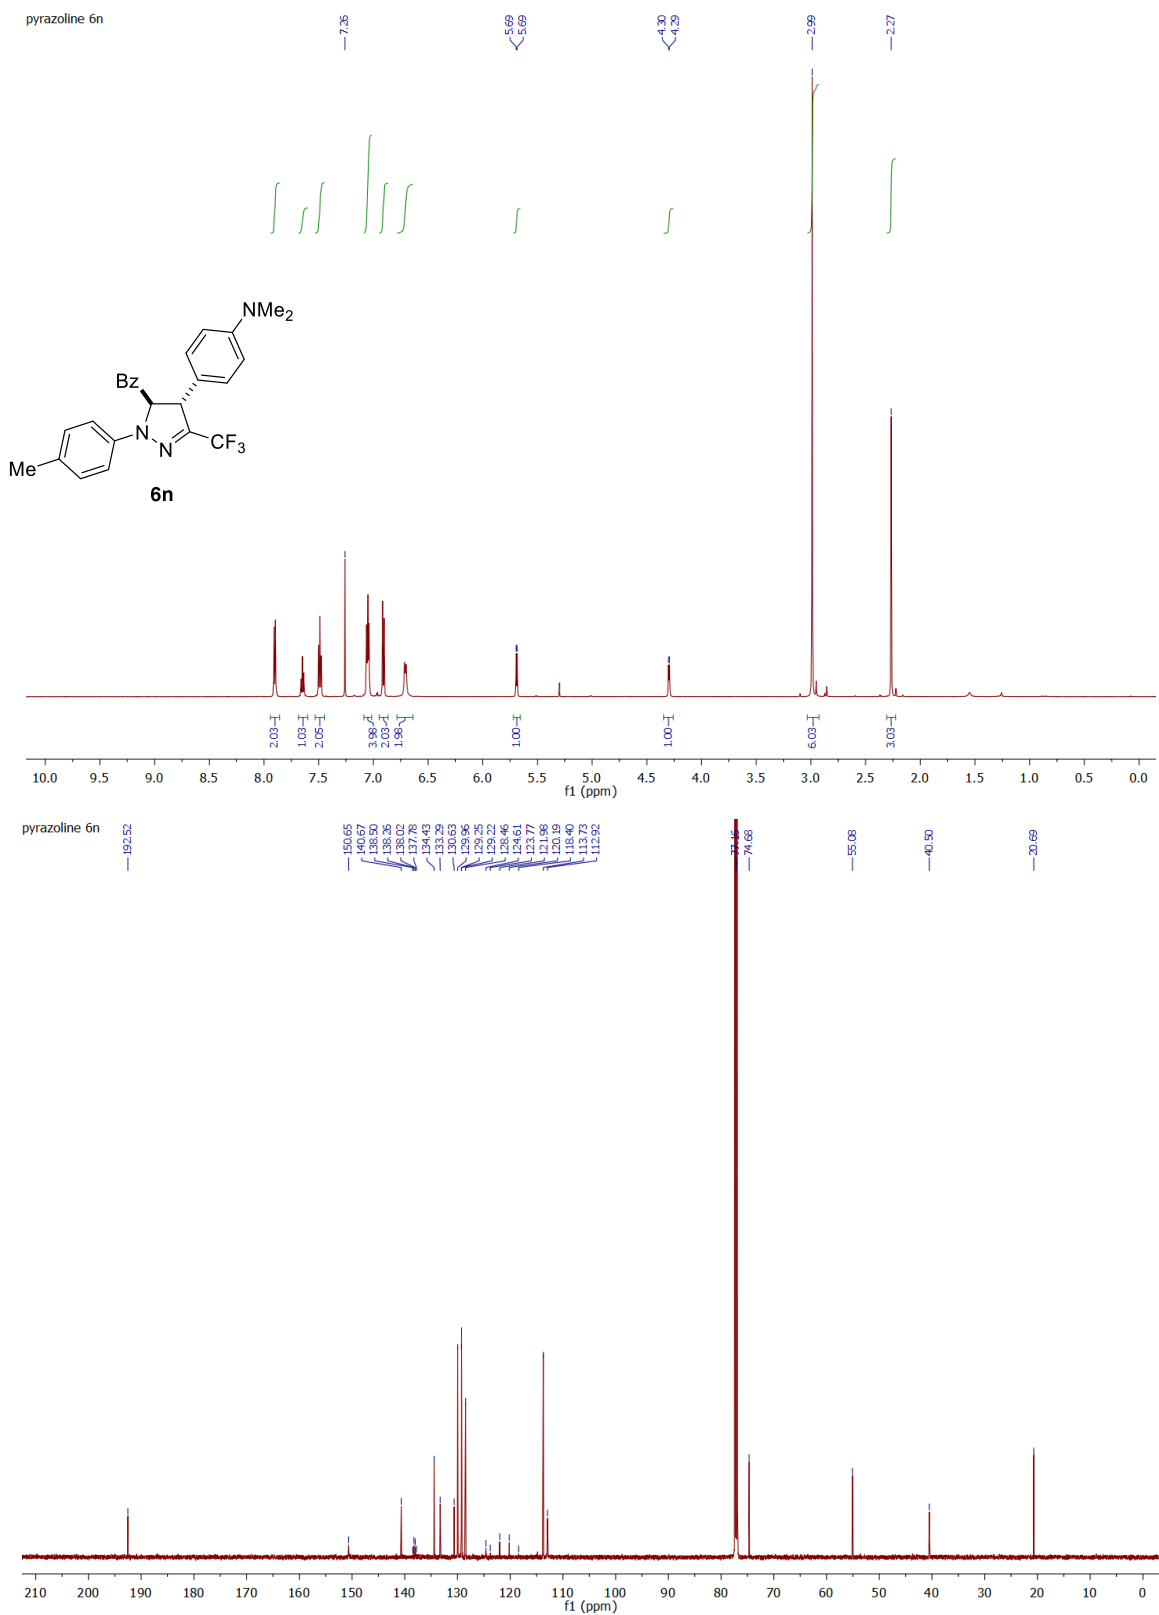

Figure S5. <sup>1</sup>H NMR (600 MHz, CDCl<sub>3</sub>) and <sup>13</sup>C NMR (151 MHz, CDCl<sub>3</sub>) spectra for compound **6n**.

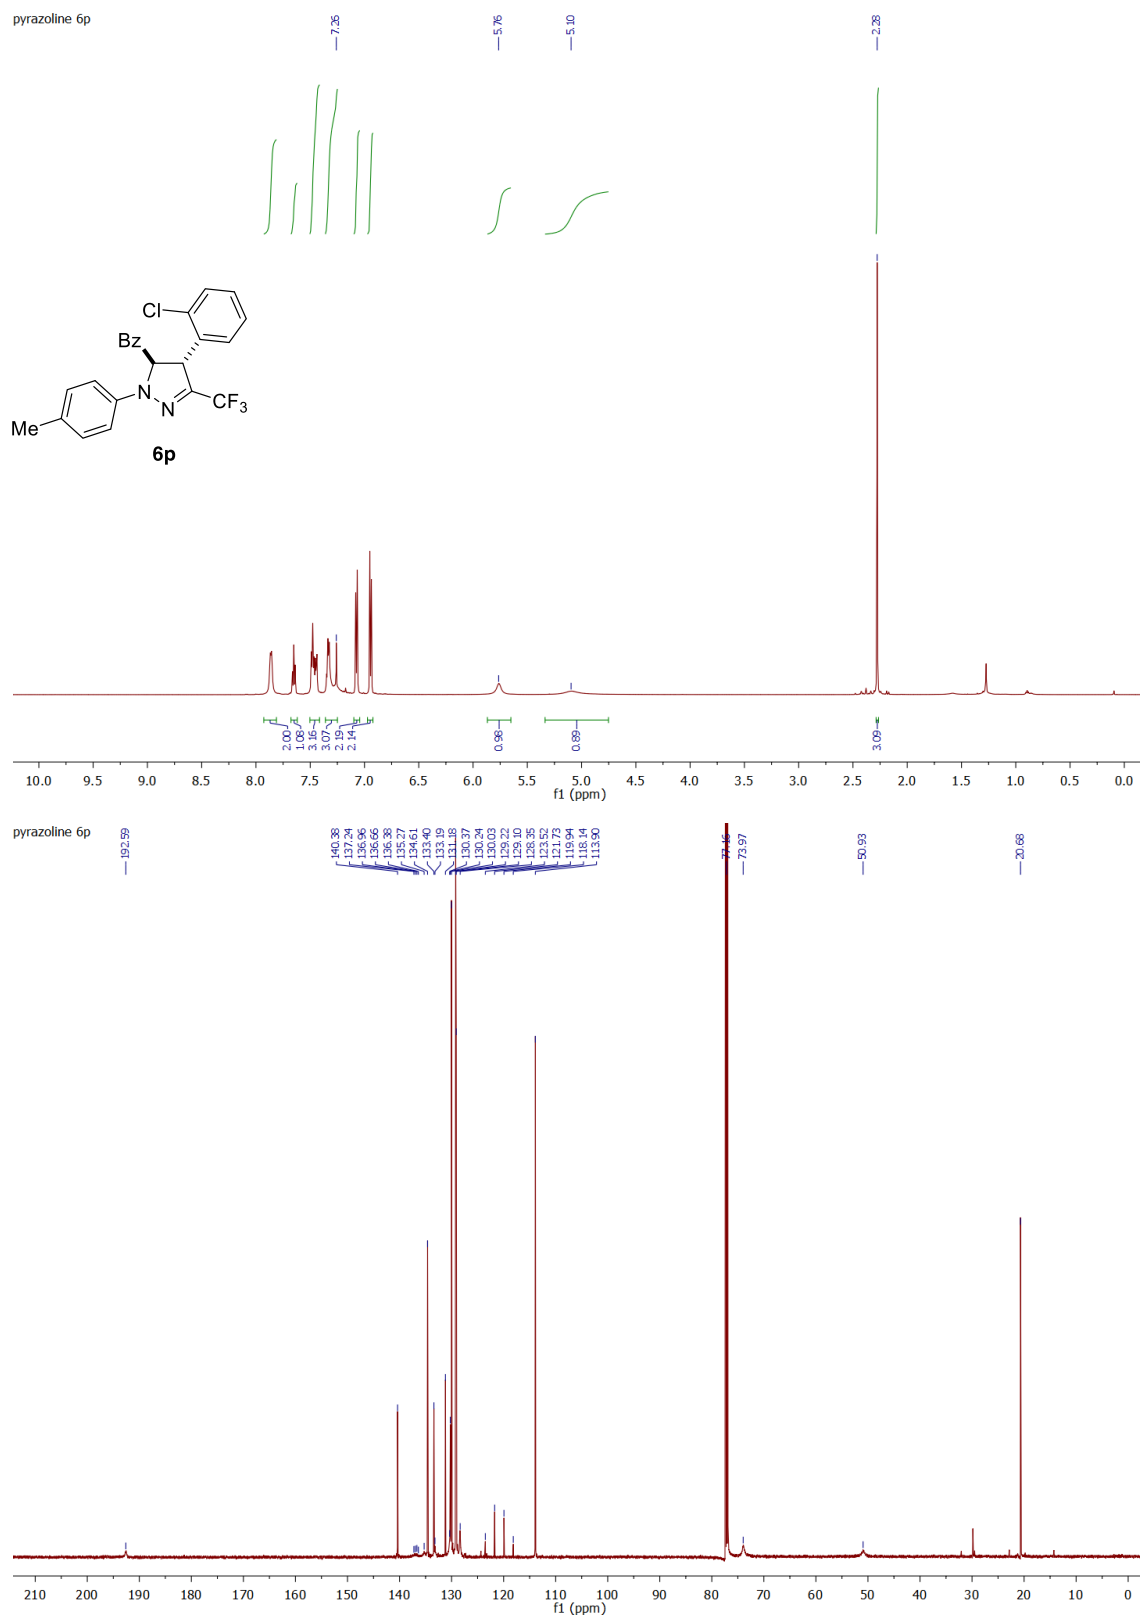

**Figure S6.** <sup>1</sup>H NMR (600 MHz, CDCl<sub>3</sub>) and <sup>13</sup>C NMR (151 MHz, CDCl<sub>3</sub>) spectra for compound **6p**.

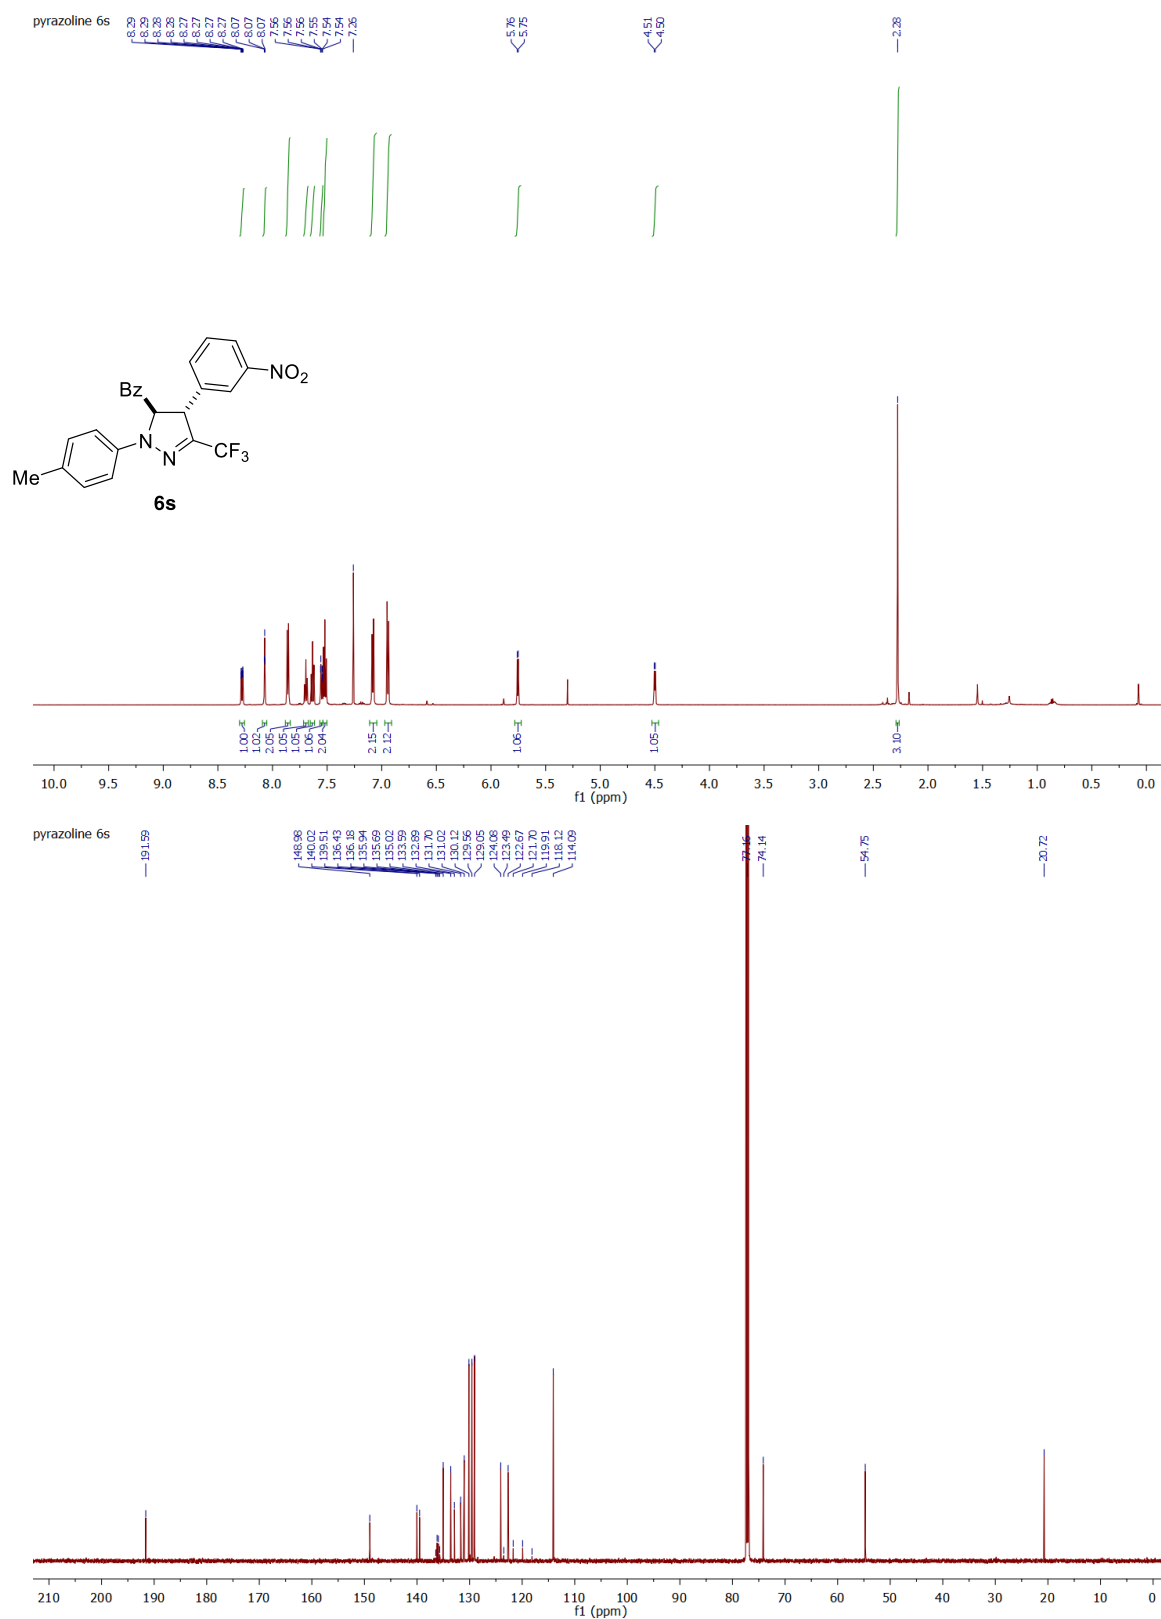

**Figure S7.** <sup>1</sup>H NMR (600 MHz, CDCl<sub>3</sub>) and <sup>13</sup>C NMR (151 MHz, CDCl<sub>3</sub>) spectra for compound **6s**.



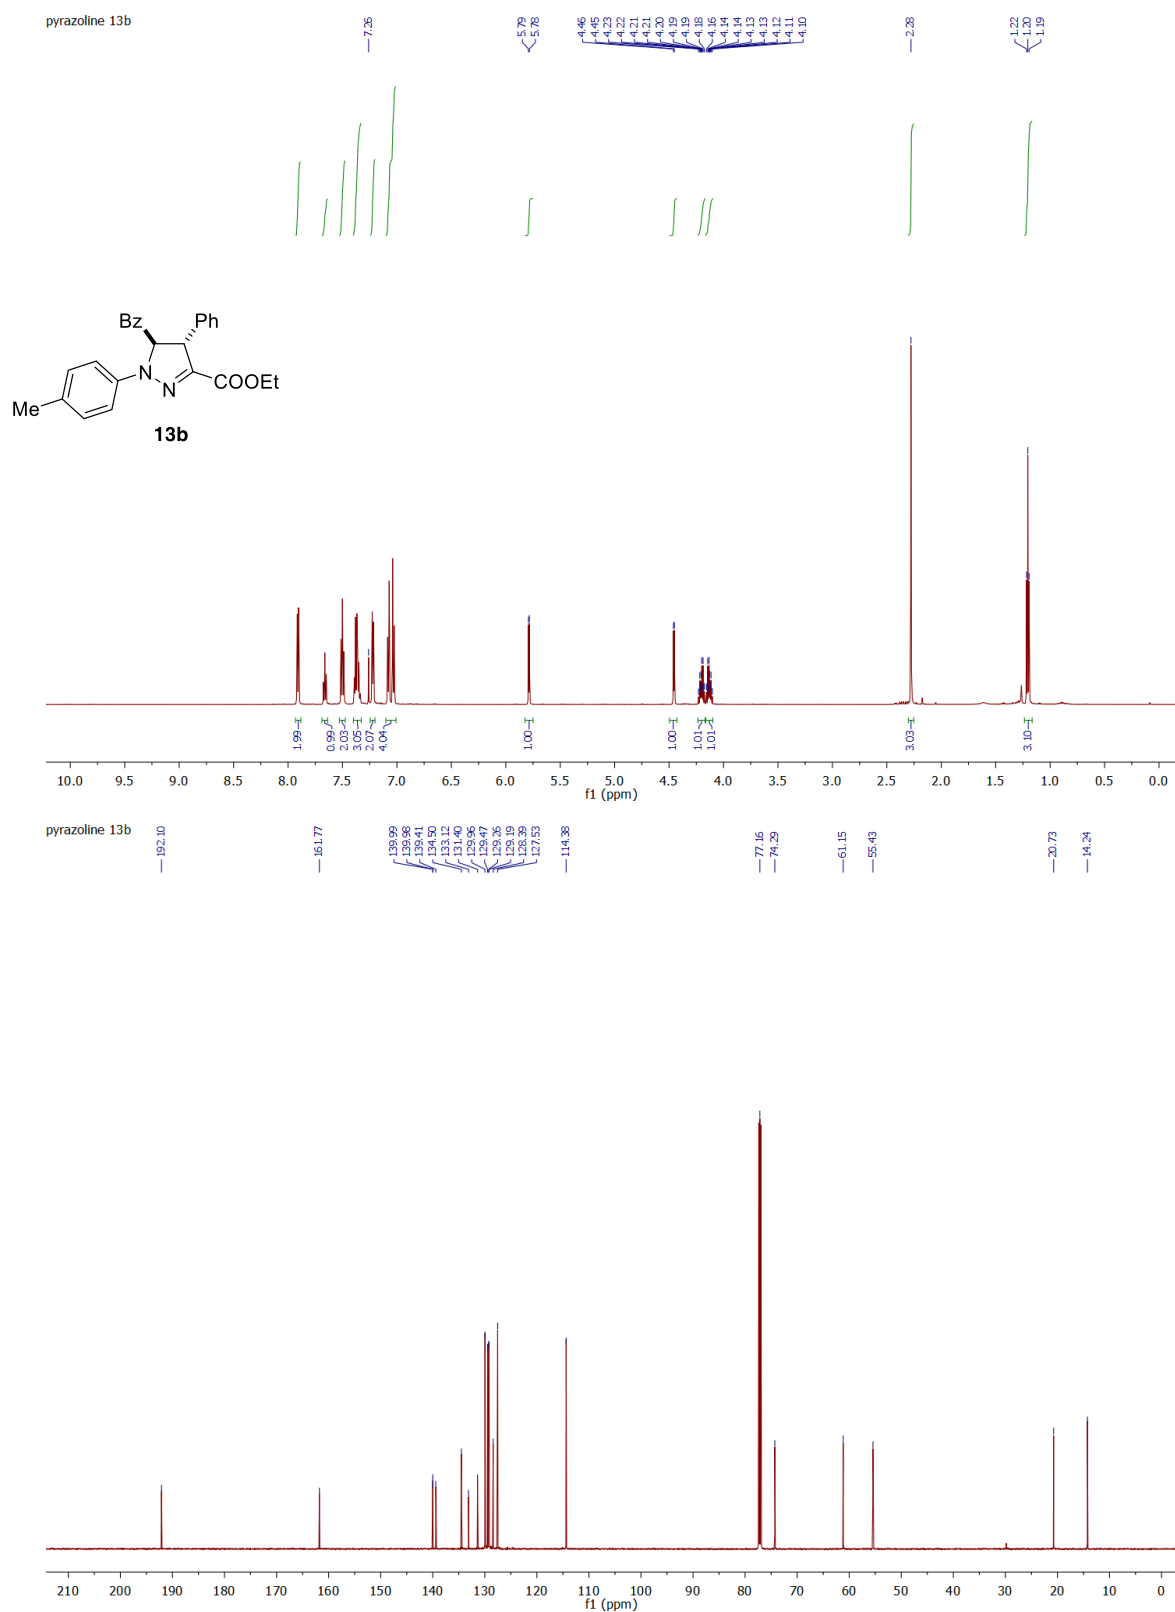

**Figure S8.** <sup>1</sup>H NMR (600 MHz, CDCl<sub>3</sub>) and <sup>13</sup>C NMR (151 MHz, CDCl<sub>3</sub>) spectra for compound **13b**.

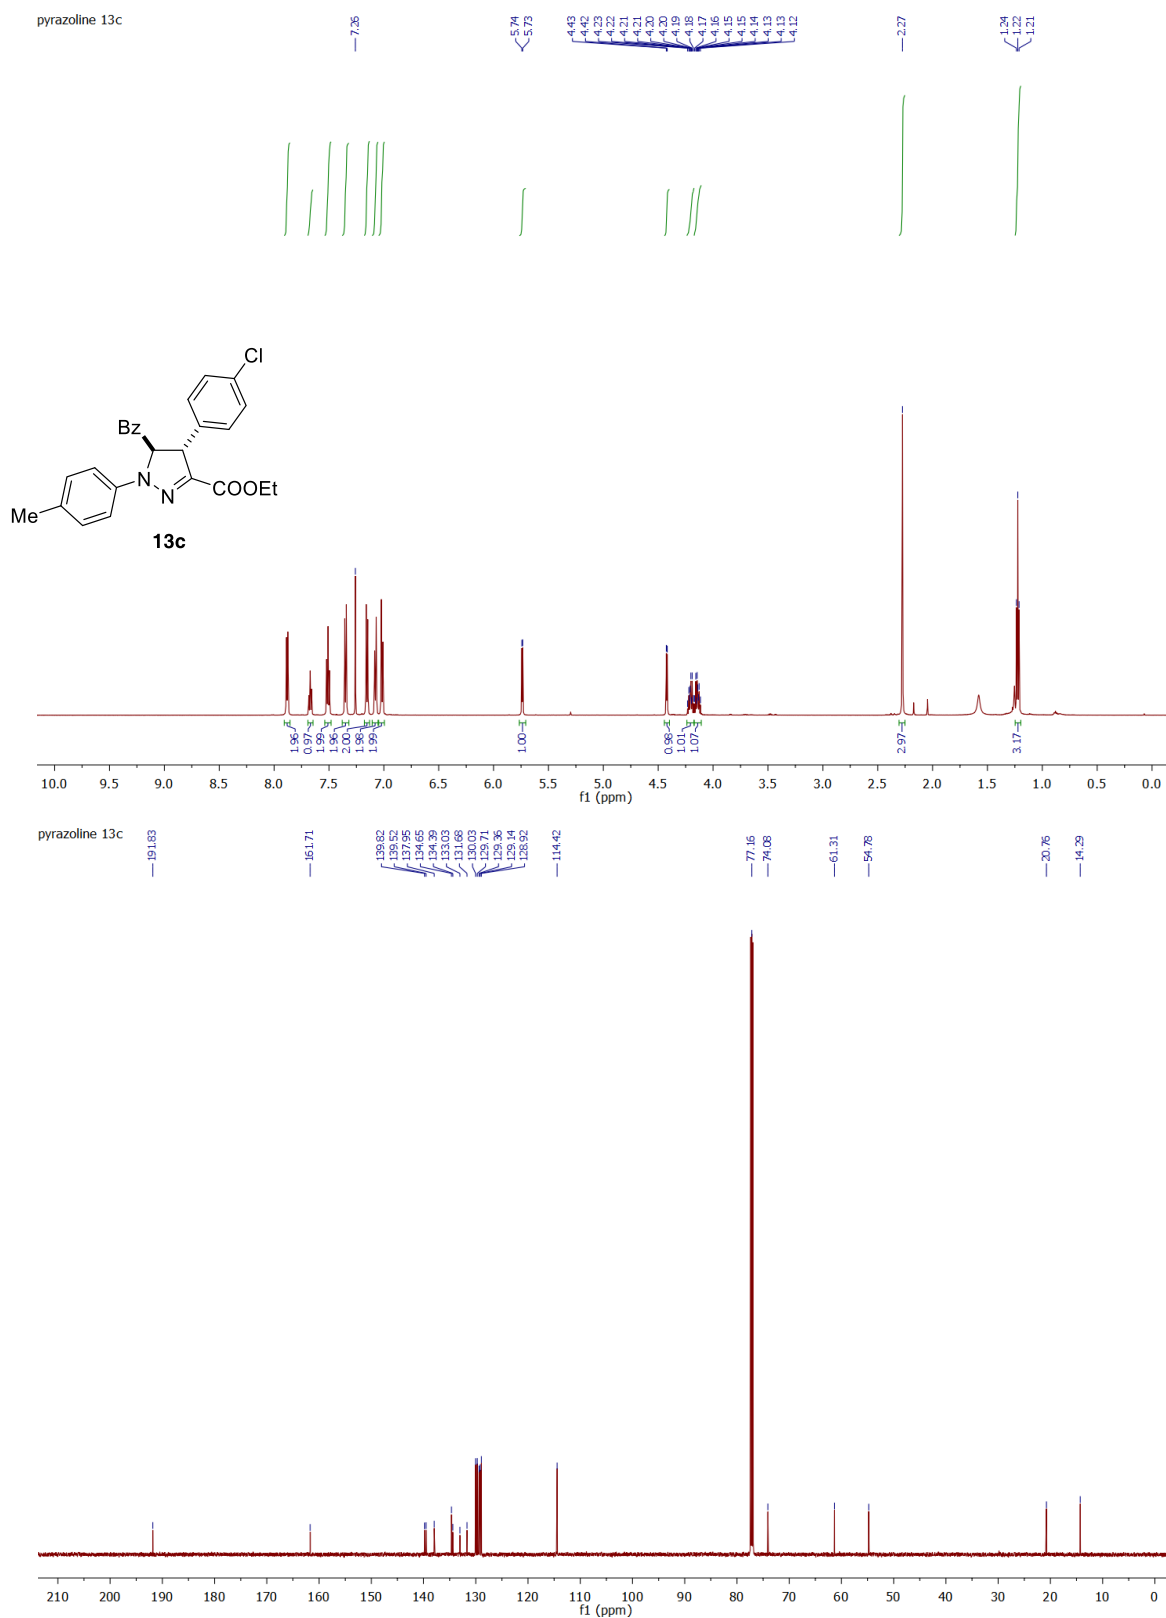

**Figure S9.** <sup>1</sup>H NMR (600 MHz, CDCl<sub>3</sub>) and <sup>13</sup>C NMR (151 MHz, CDCl<sub>3</sub>) spectra for compound **13c**.

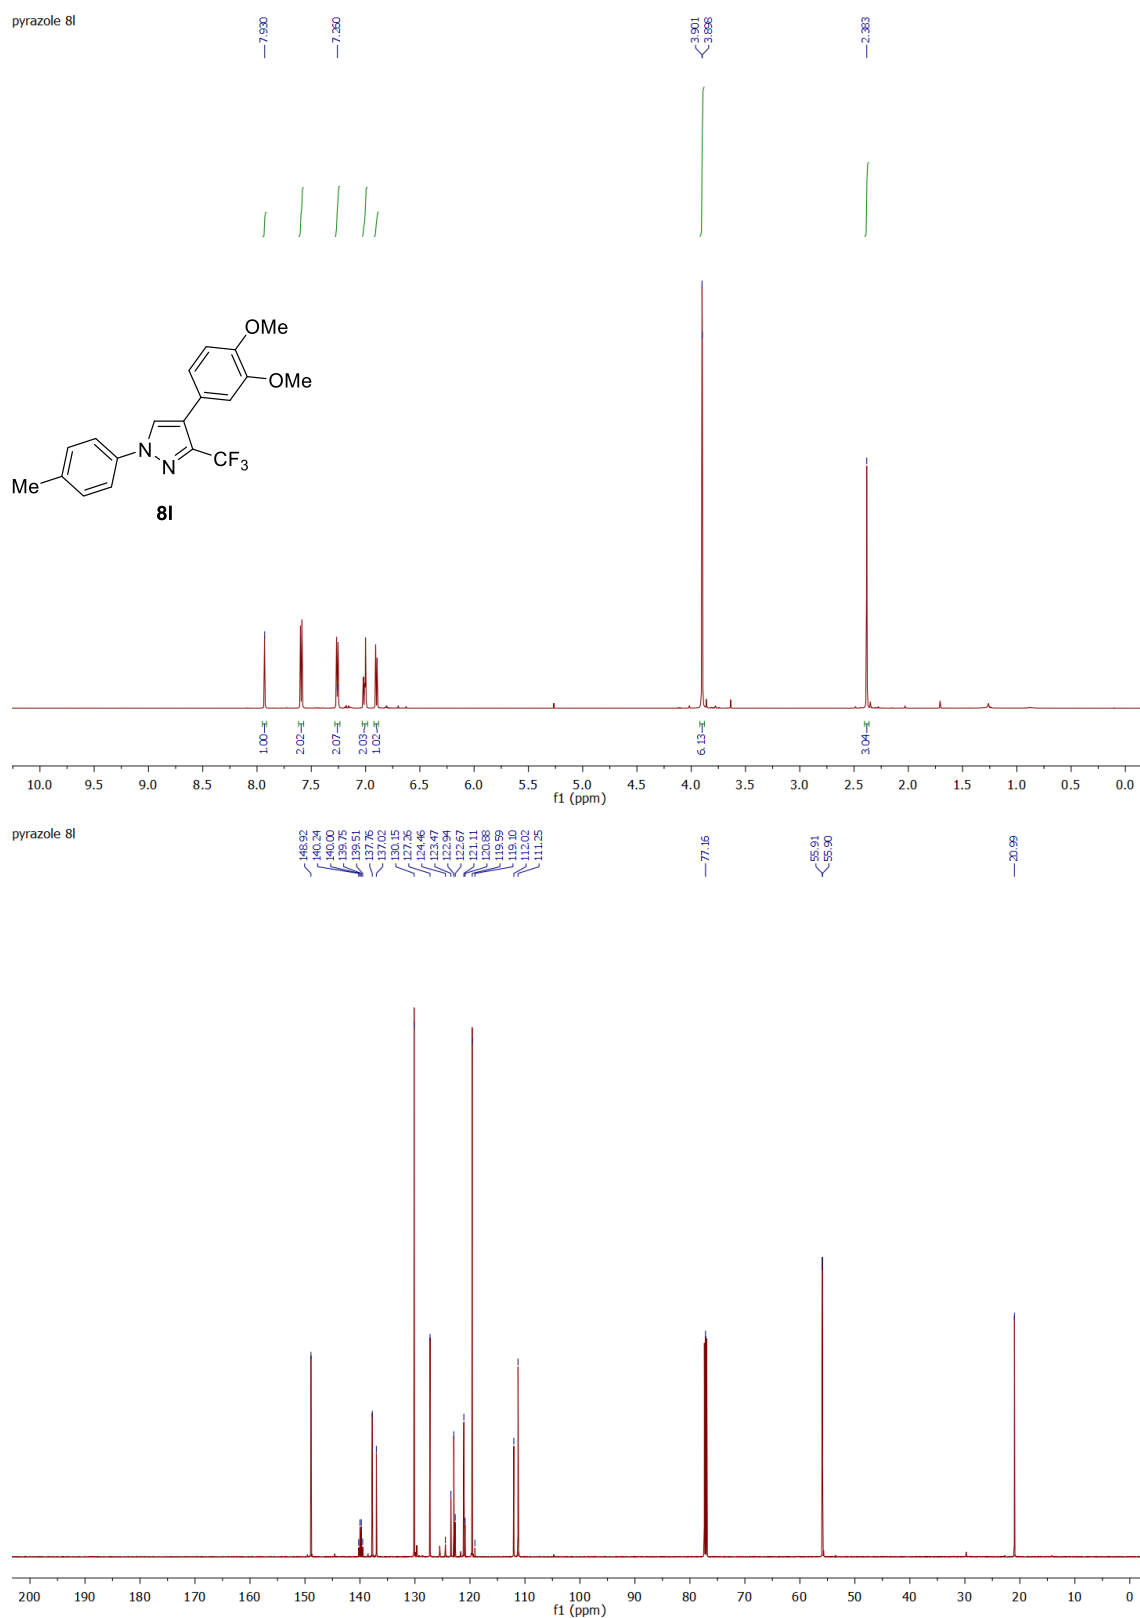

**Figure S10.** <sup>1</sup>H NMR (600 MHz, CDCl<sub>3</sub>) and <sup>13</sup>C NMR (151 MHz, CDCl<sub>3</sub>) spectra for compound **8I**.

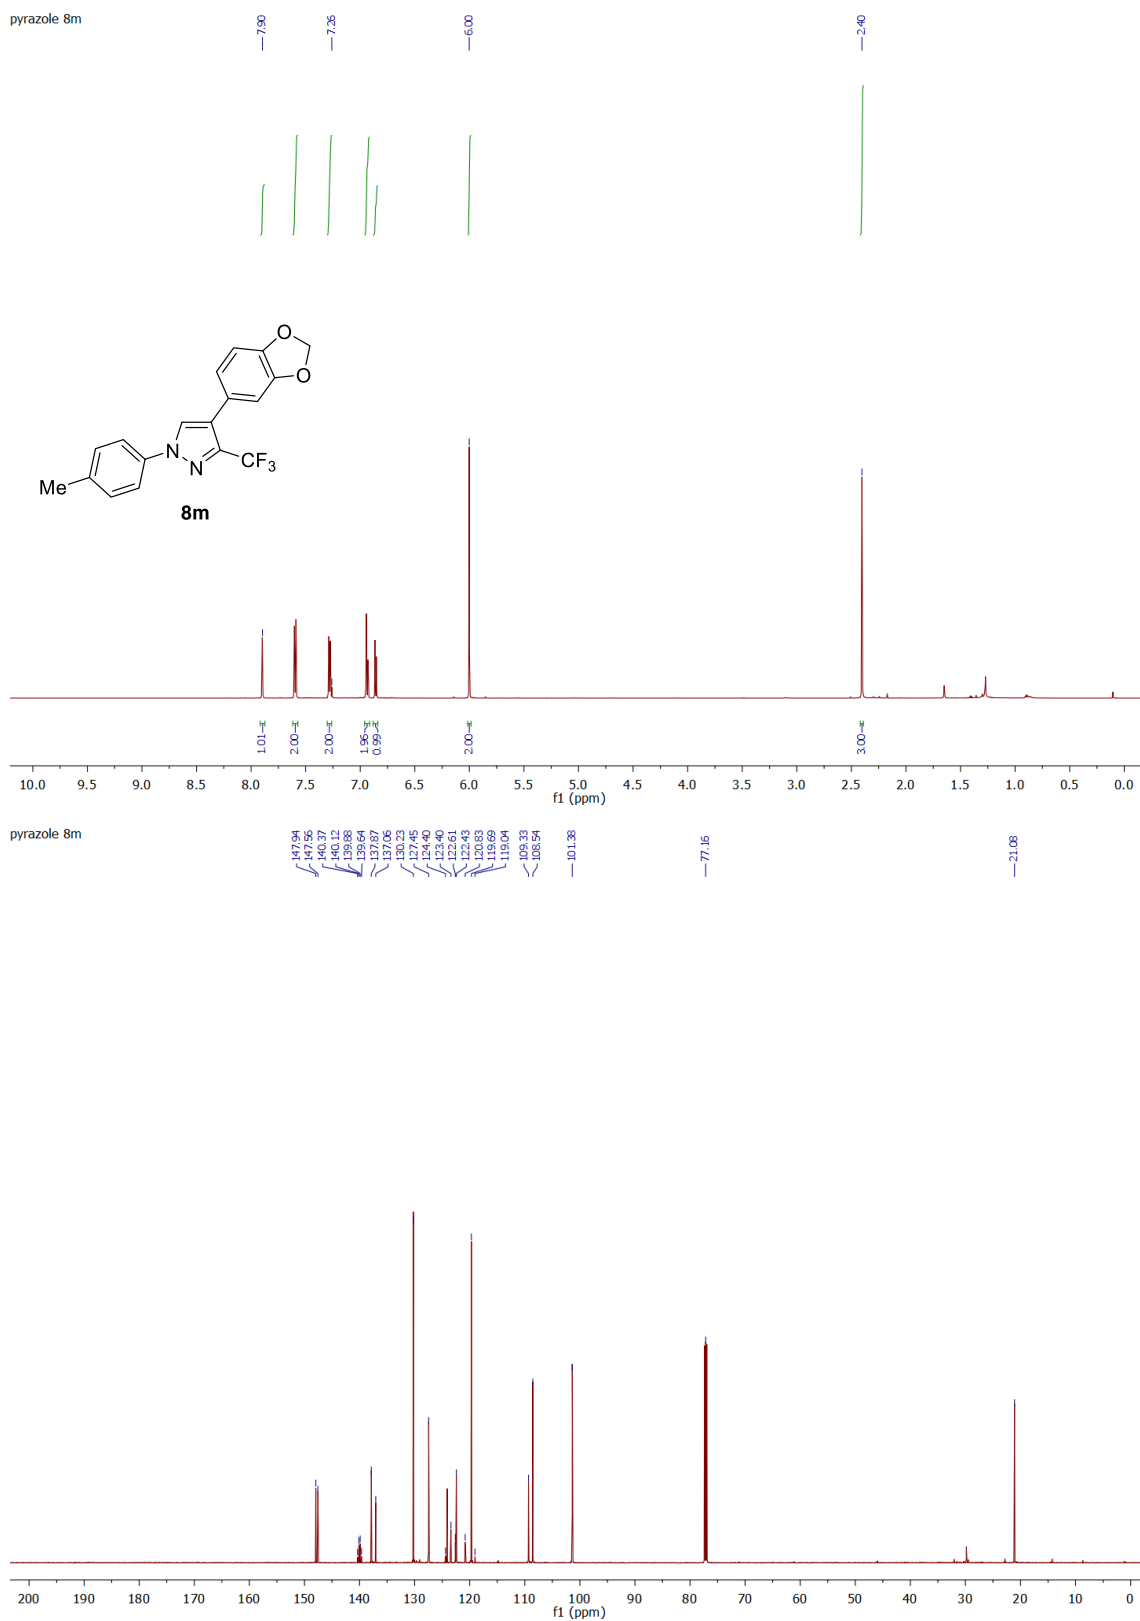

**Figure S11.** <sup>1</sup>H NMR (600 MHz, CDCl<sub>3</sub>) and <sup>13</sup>C NMR (151 MHz, CDCl<sub>3</sub>) spectra for compound **8m**.

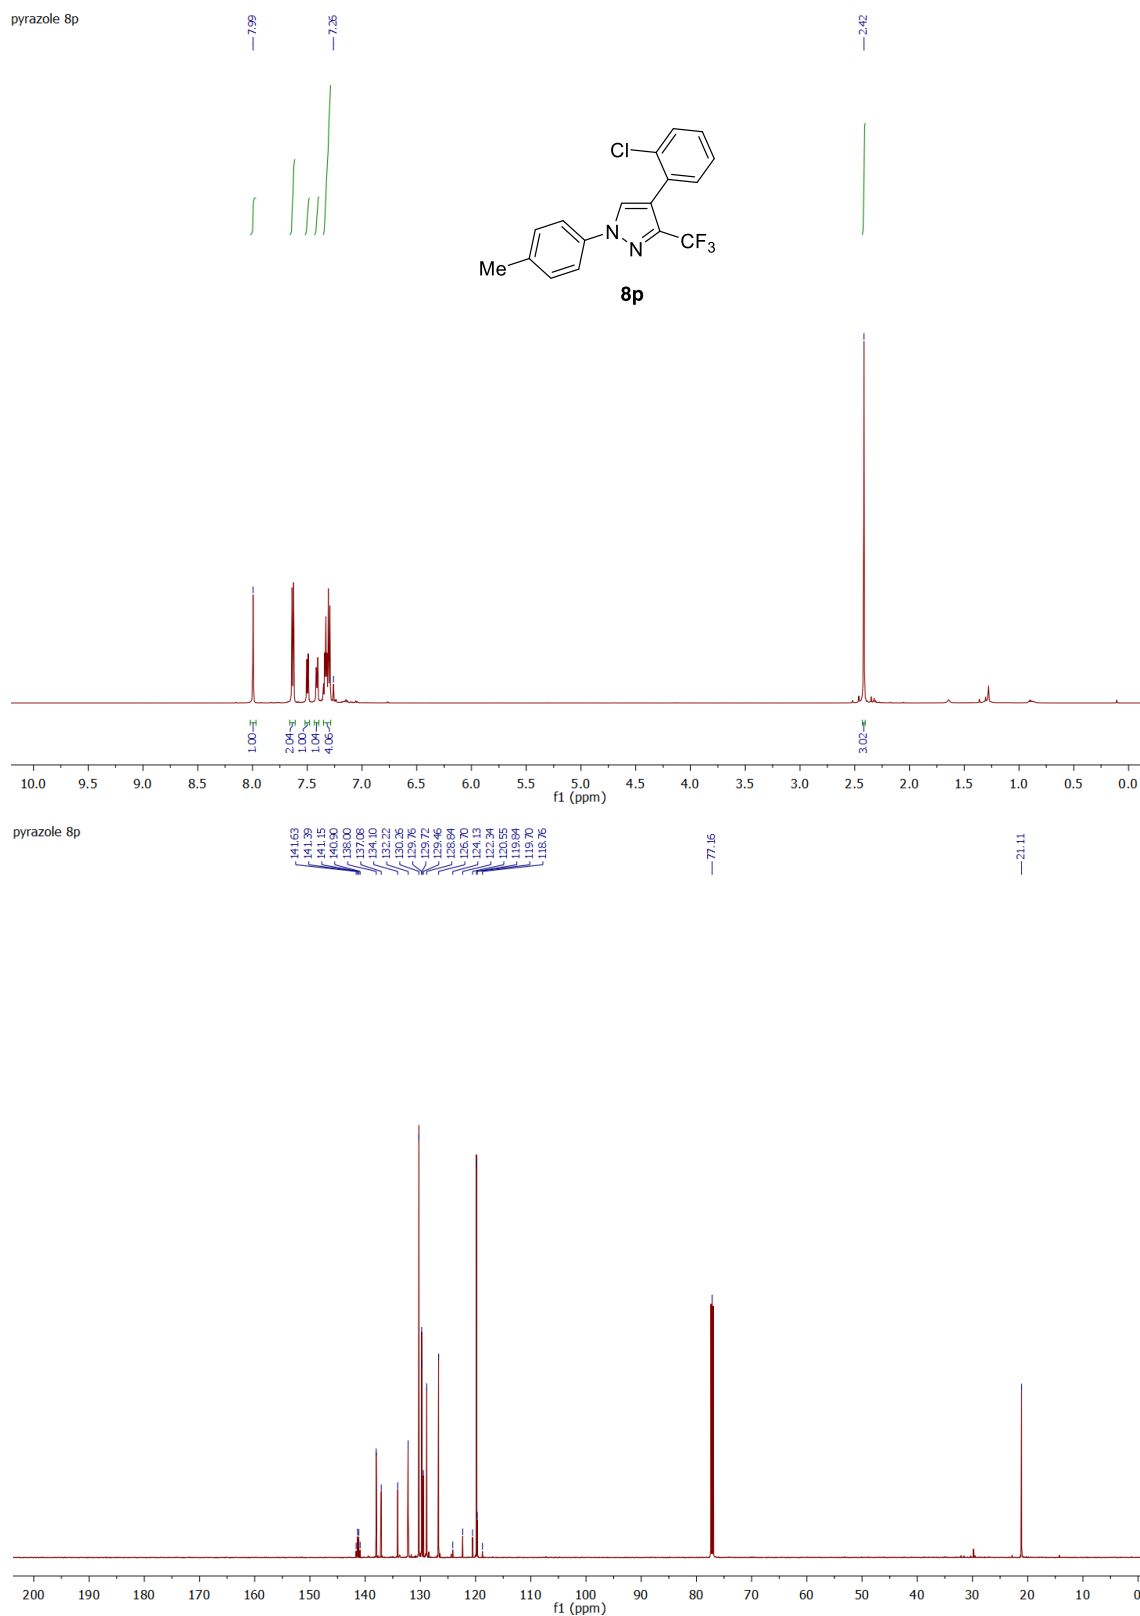

**Figure S12.** <sup>1</sup>H NMR (600 MHz, CDCl<sub>3</sub>) and <sup>13</sup>C NMR (151 MHz, CDCl<sub>3</sub>) spectra for compound **8p**.

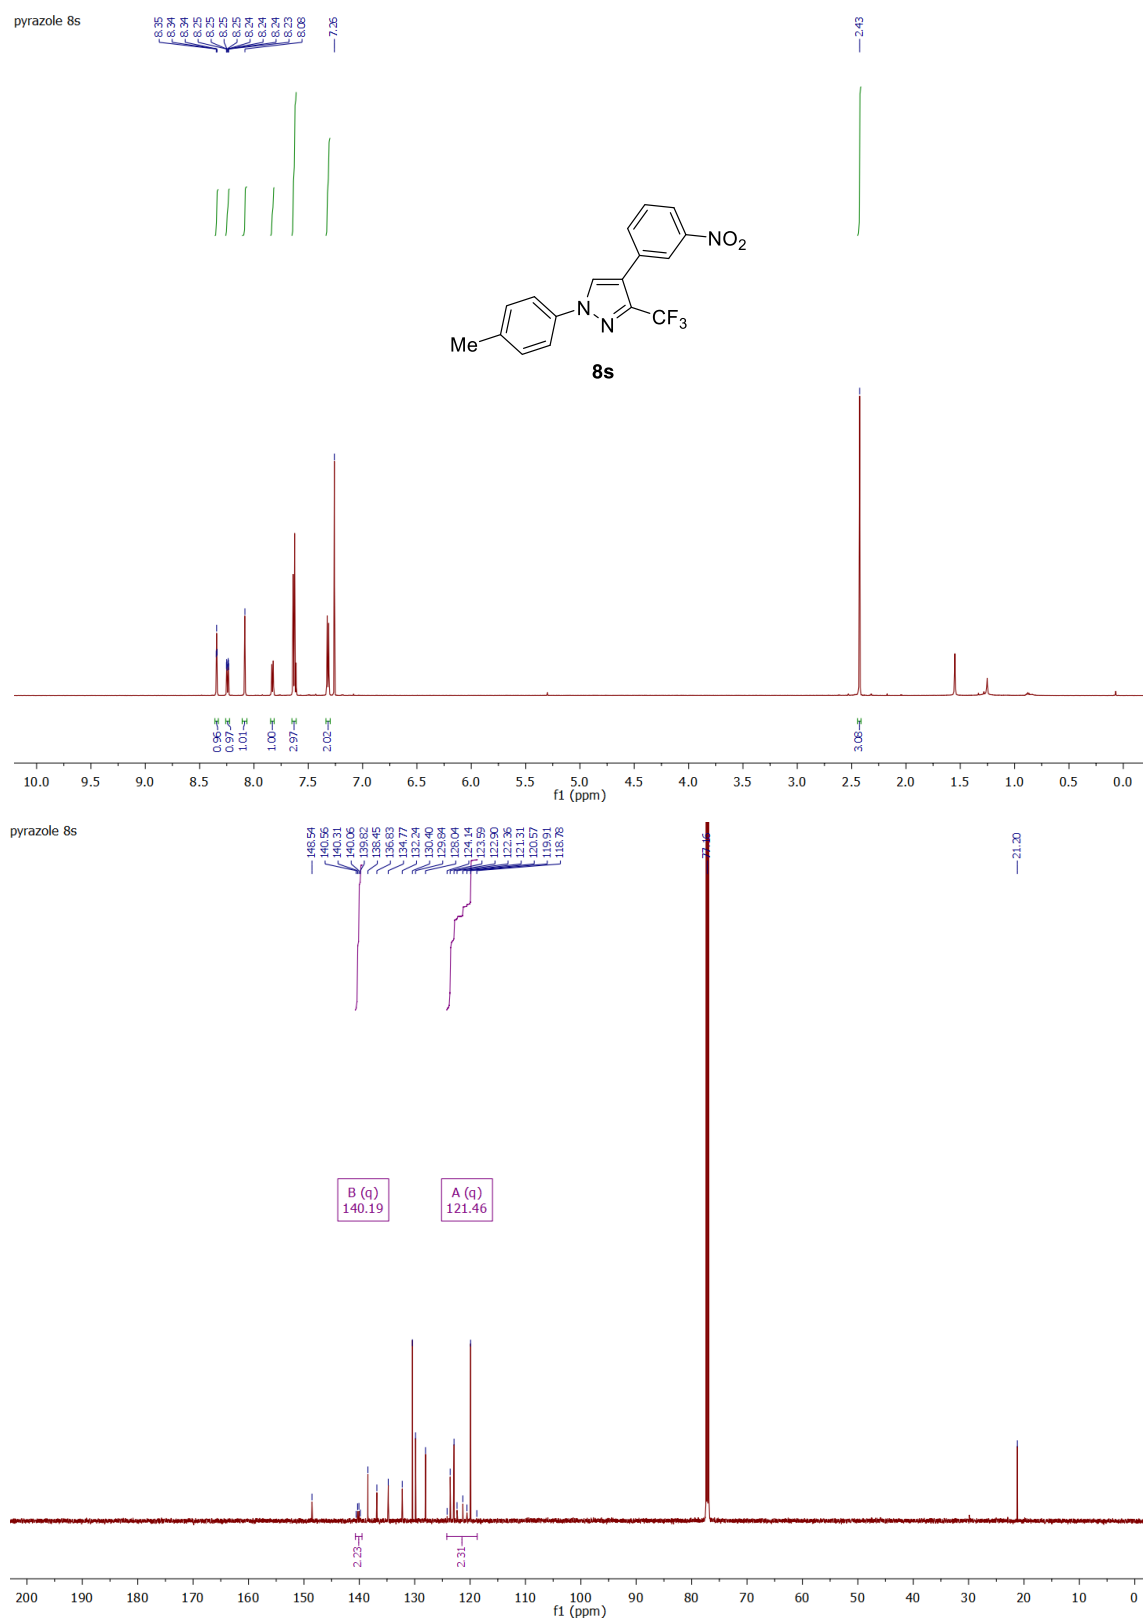

**Figure S13.** <sup>1</sup>H NMR (600 MHz, CDCl<sub>3</sub>) and <sup>13</sup>C NMR (151 MHz, CDCl<sub>3</sub>) spectra for compound **8s**.

pyrazole 12b

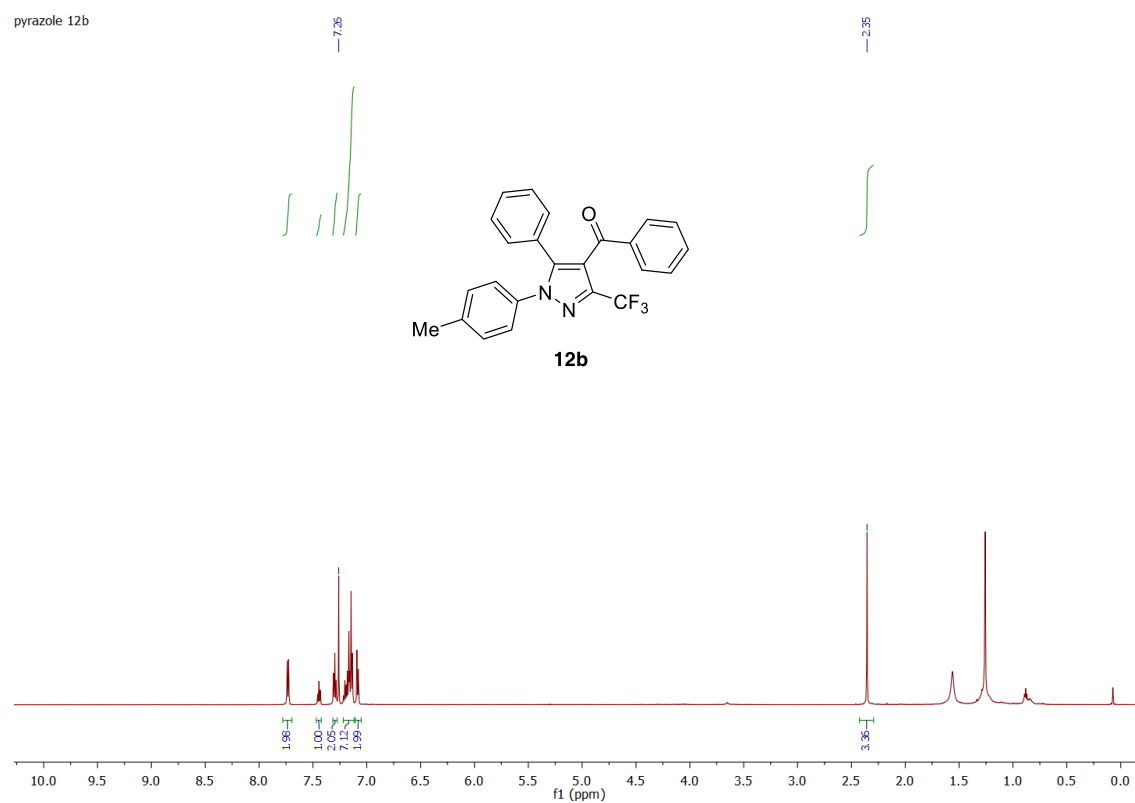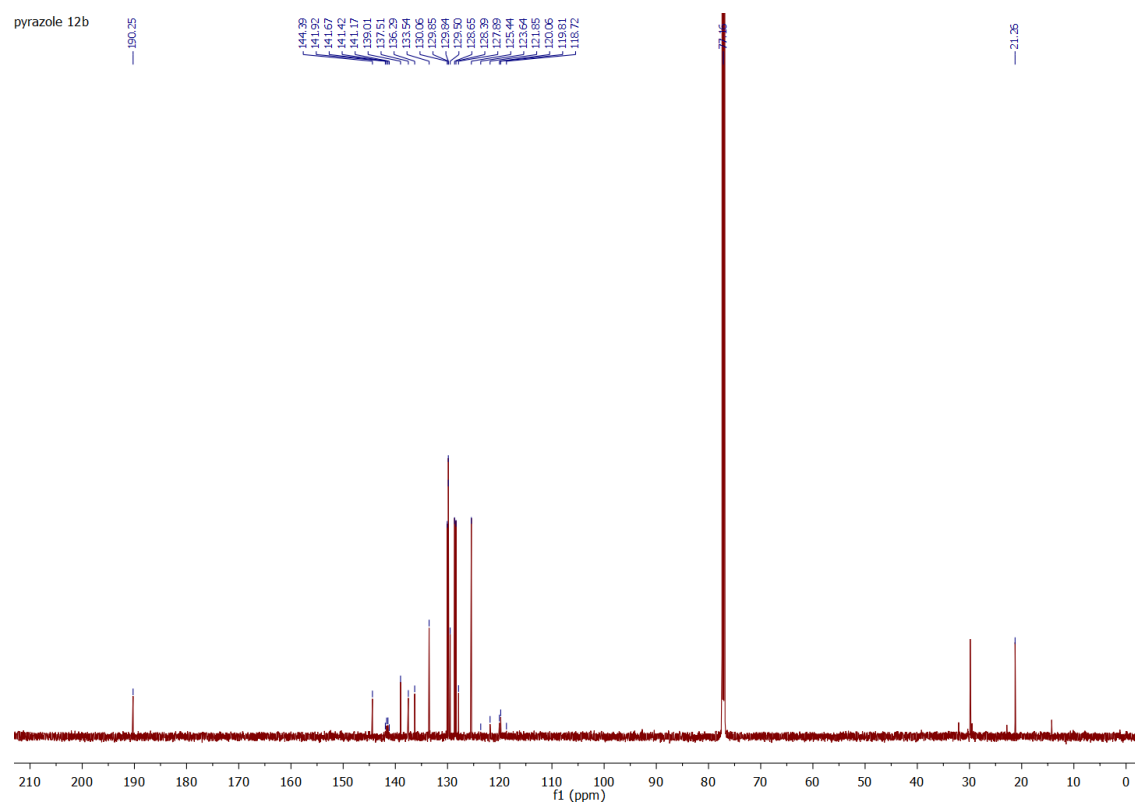

**Figure S14.** <sup>1</sup>H NMR (600 MHz, CDCl<sub>3</sub>) and <sup>13</sup>C NMR (151 MHz, CDCl<sub>3</sub>) spectra for compound **12b**.

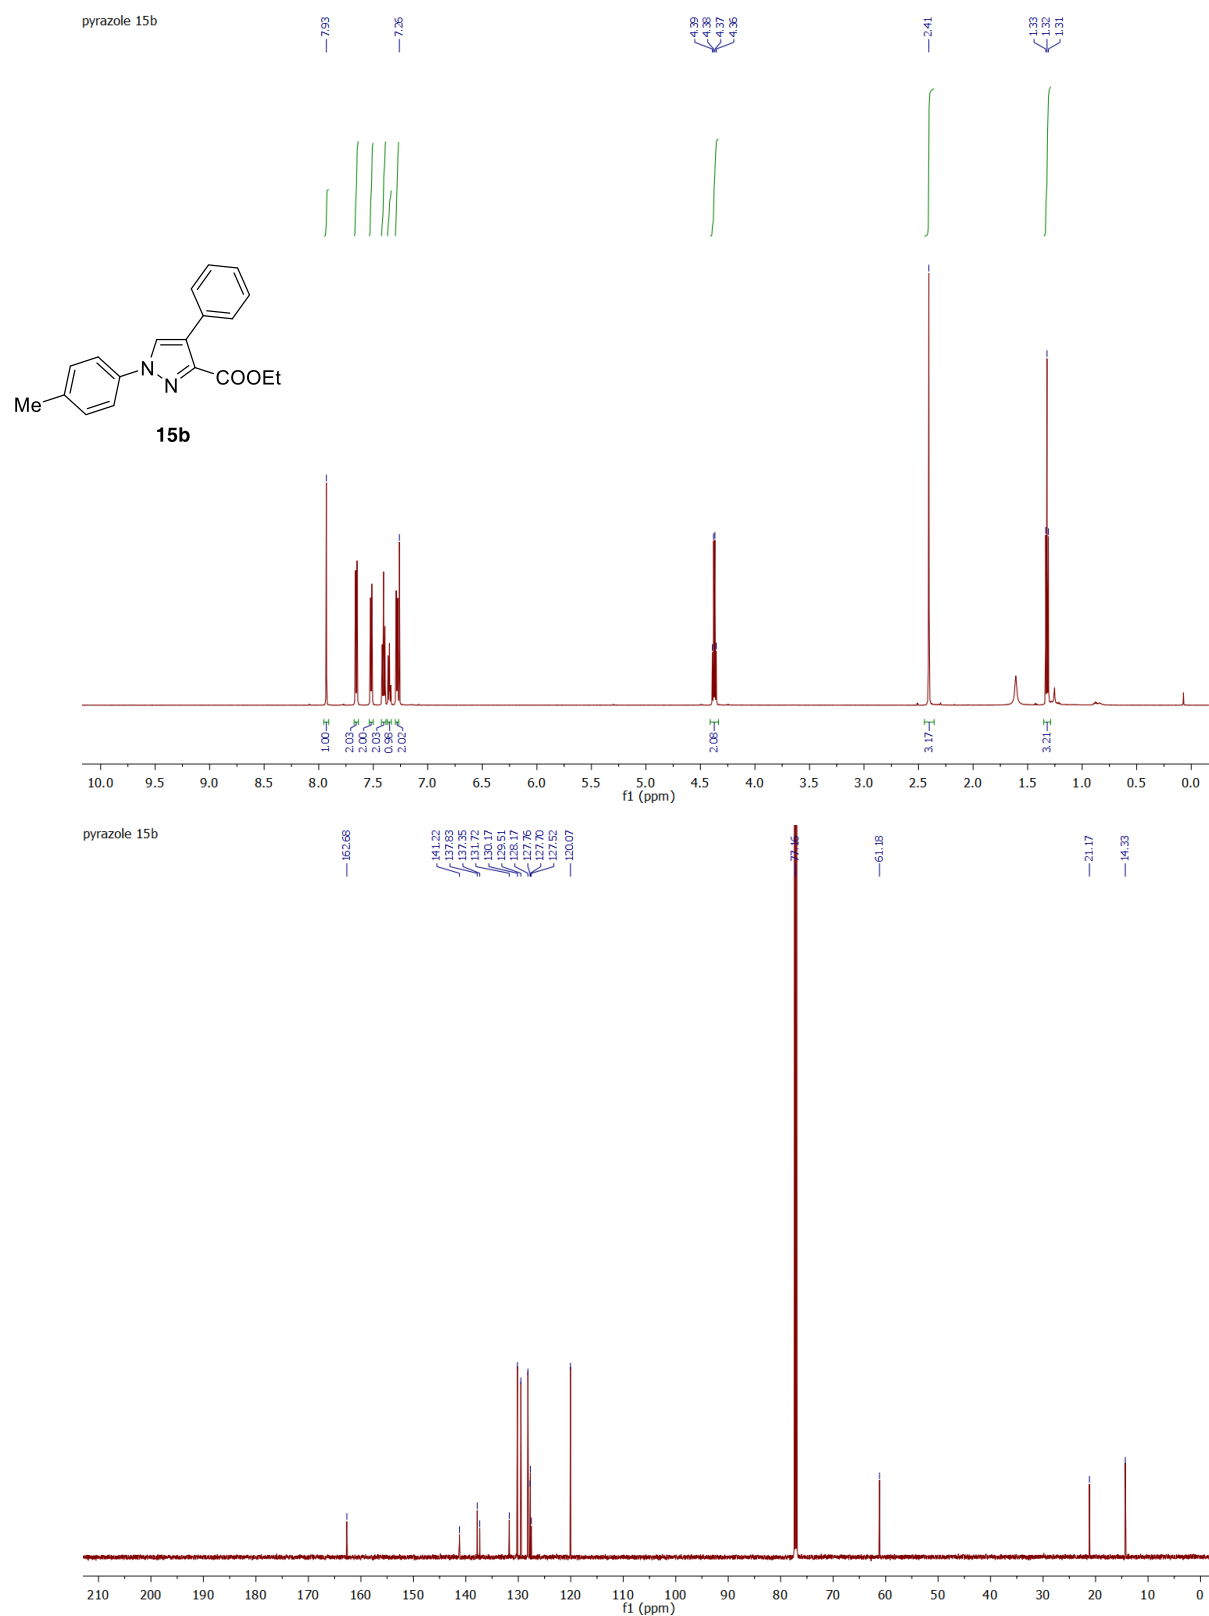

**Figure S15.**  $^1\text{H}$  NMR (600 MHz,  $\text{CDCl}_3$ ) and  $^{13}\text{C}$  NMR (151 MHz,  $\text{CDCl}_3$ ) spectra for compound **15b**.



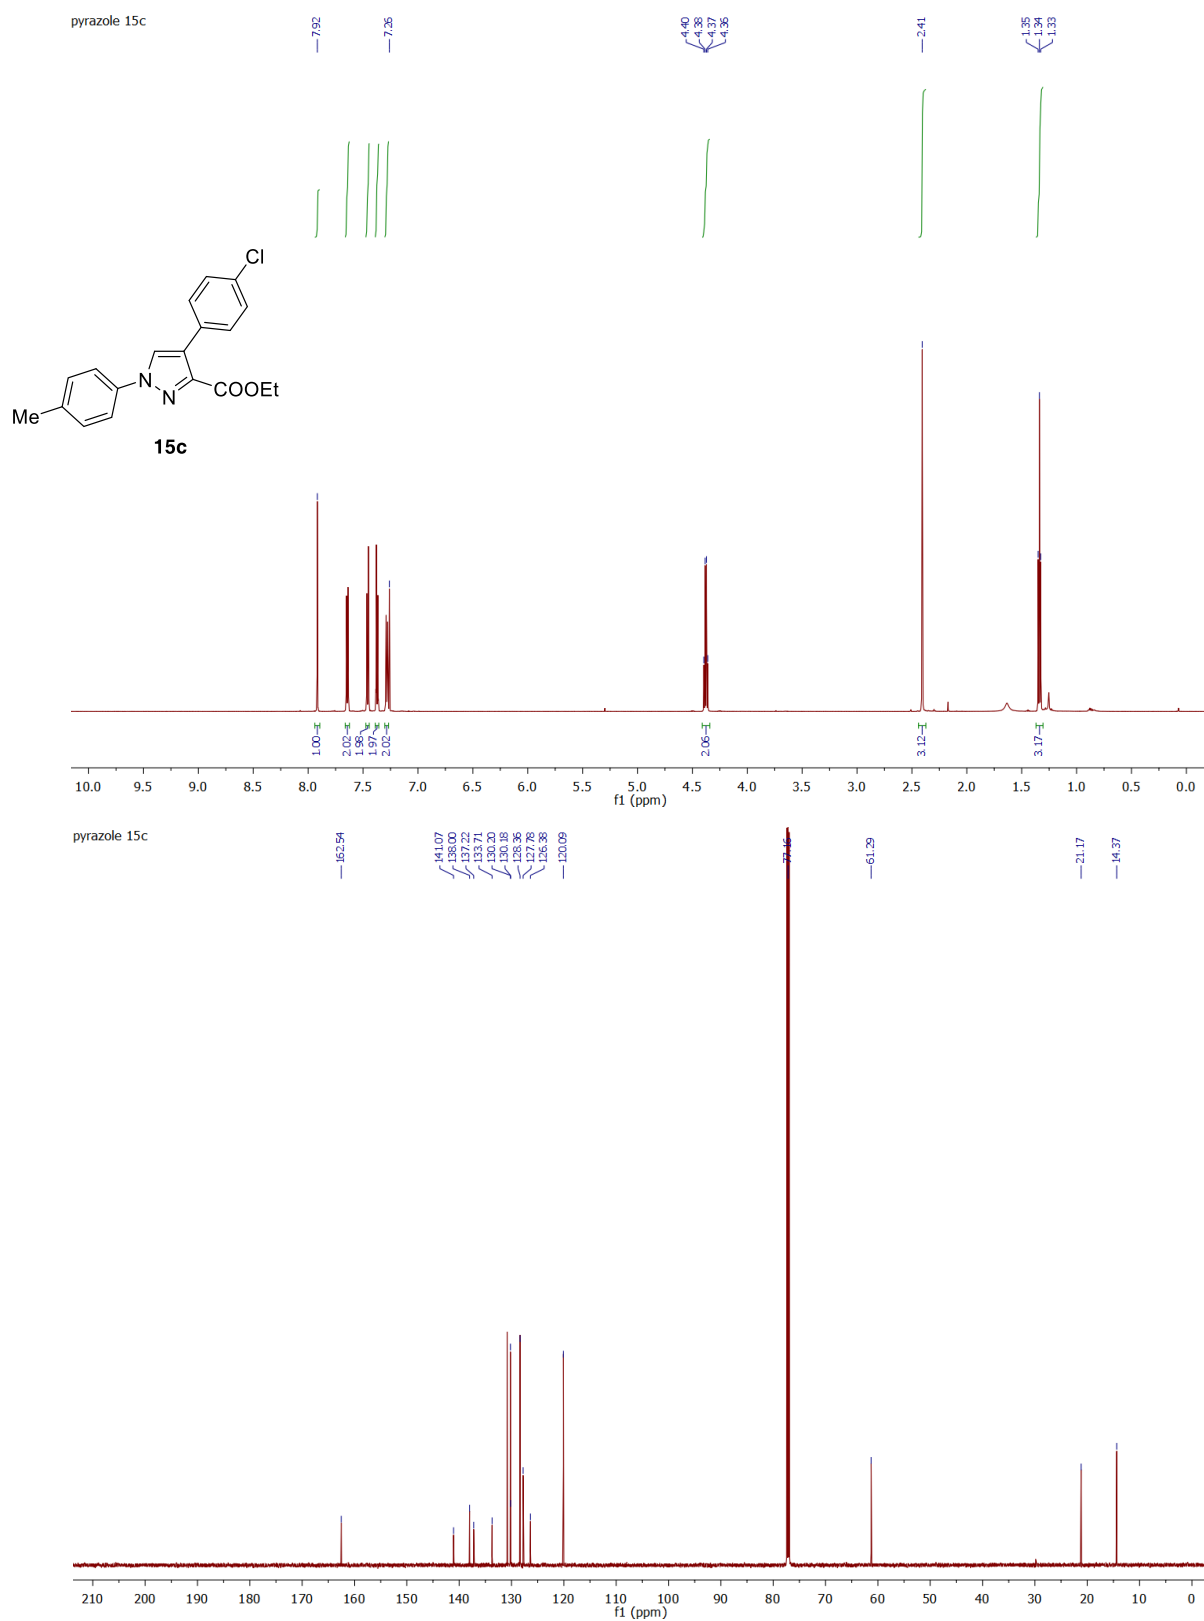

Figure S16.  $^1\text{H}$  NMR (600 MHz,  $\text{CDCl}_3$ ) and  $^{13}\text{C}$  NMR (151 MHz,  $\text{CDCl}_3$ ) spectra for compound 15c.

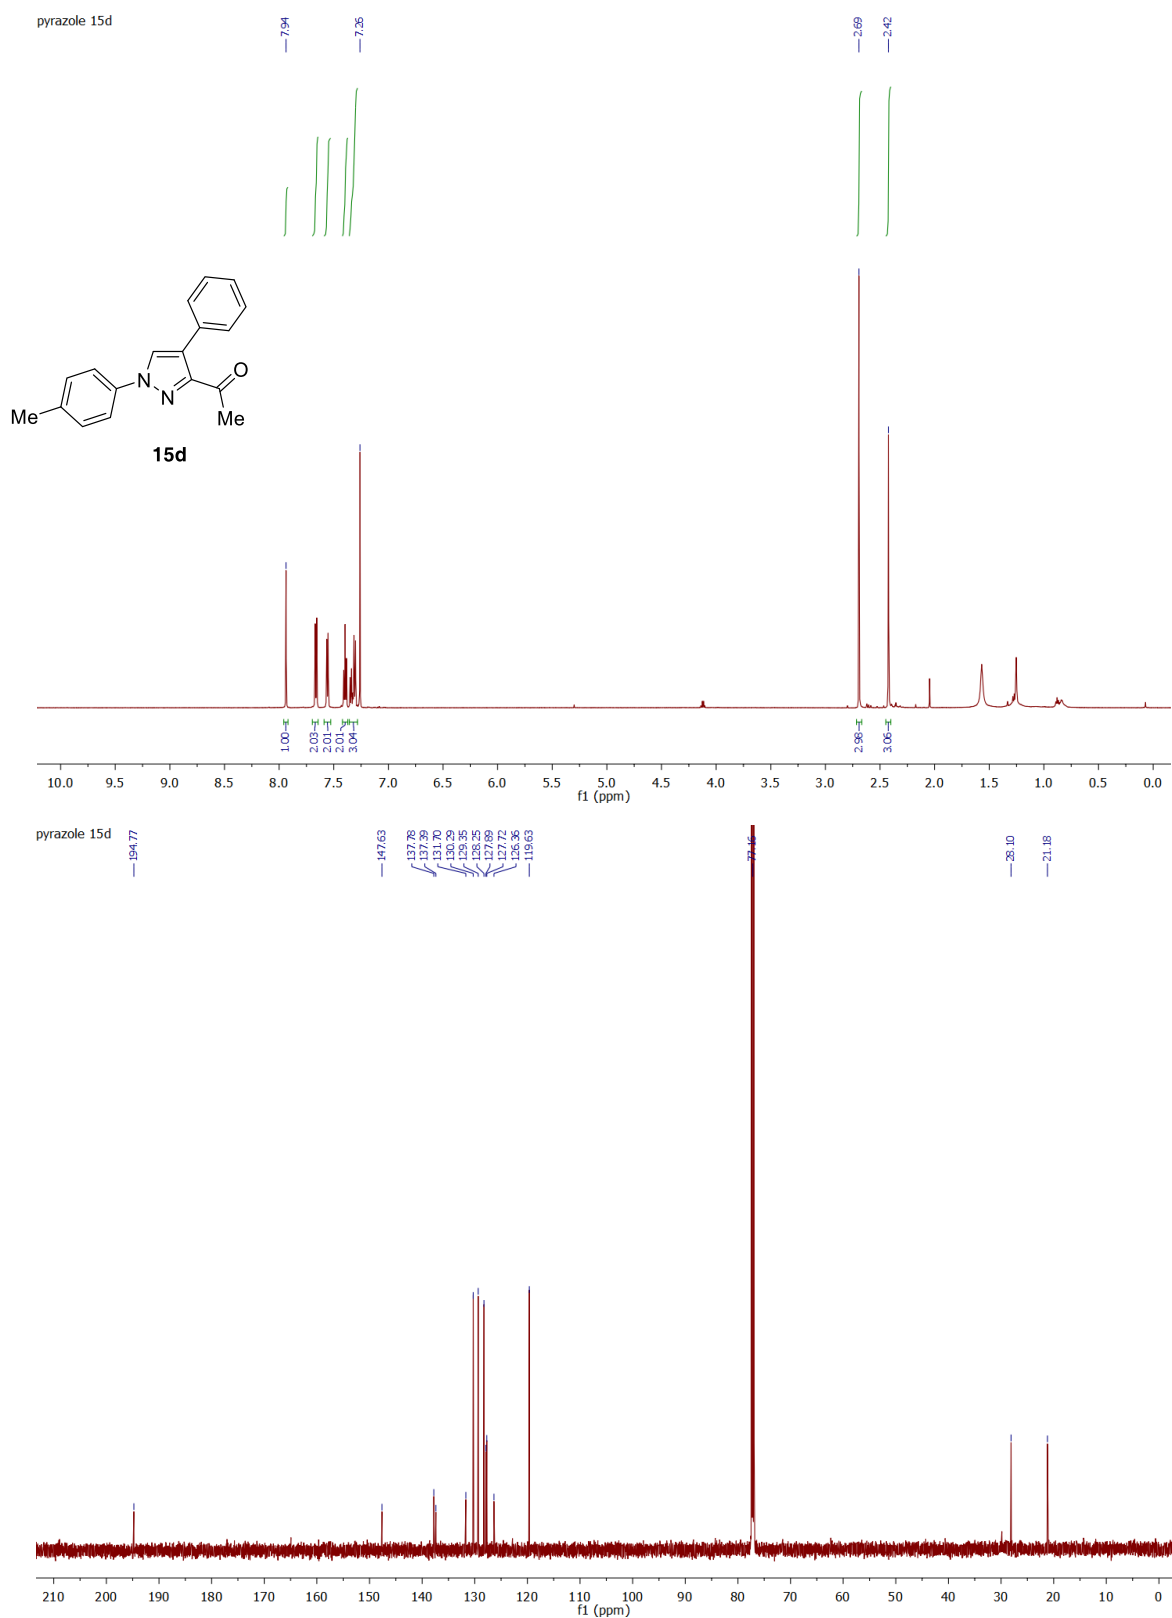

Figure S17.  $^1\text{H}$  NMR (600 MHz,  $\text{CDCl}_3$ ) and  $^{13}\text{C}$  NMR (151 MHz,  $\text{CDCl}_3$ ) spectra for compound **15d**.

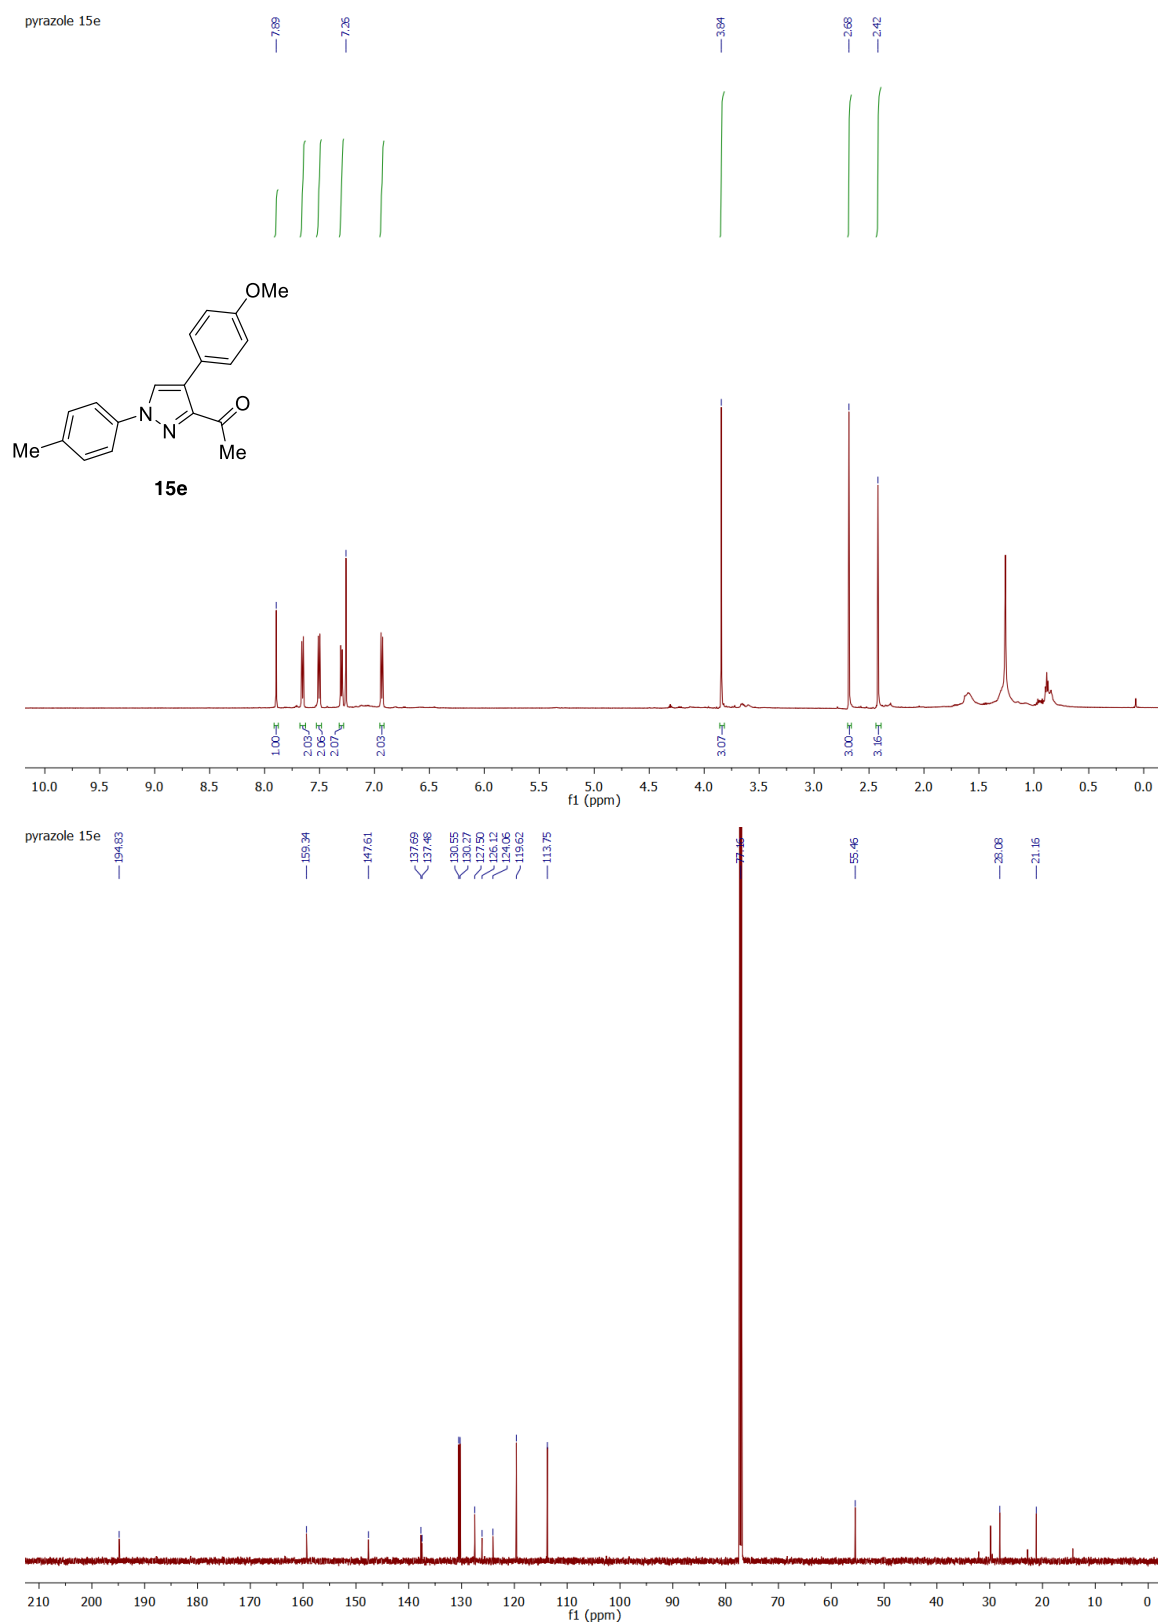

**Figure S18.** <sup>1</sup>H NMR (600 MHz, CDCl<sub>3</sub>) and <sup>13</sup>C NMR (151 MHz, CDCl<sub>3</sub>) spectra for compound **15e**.

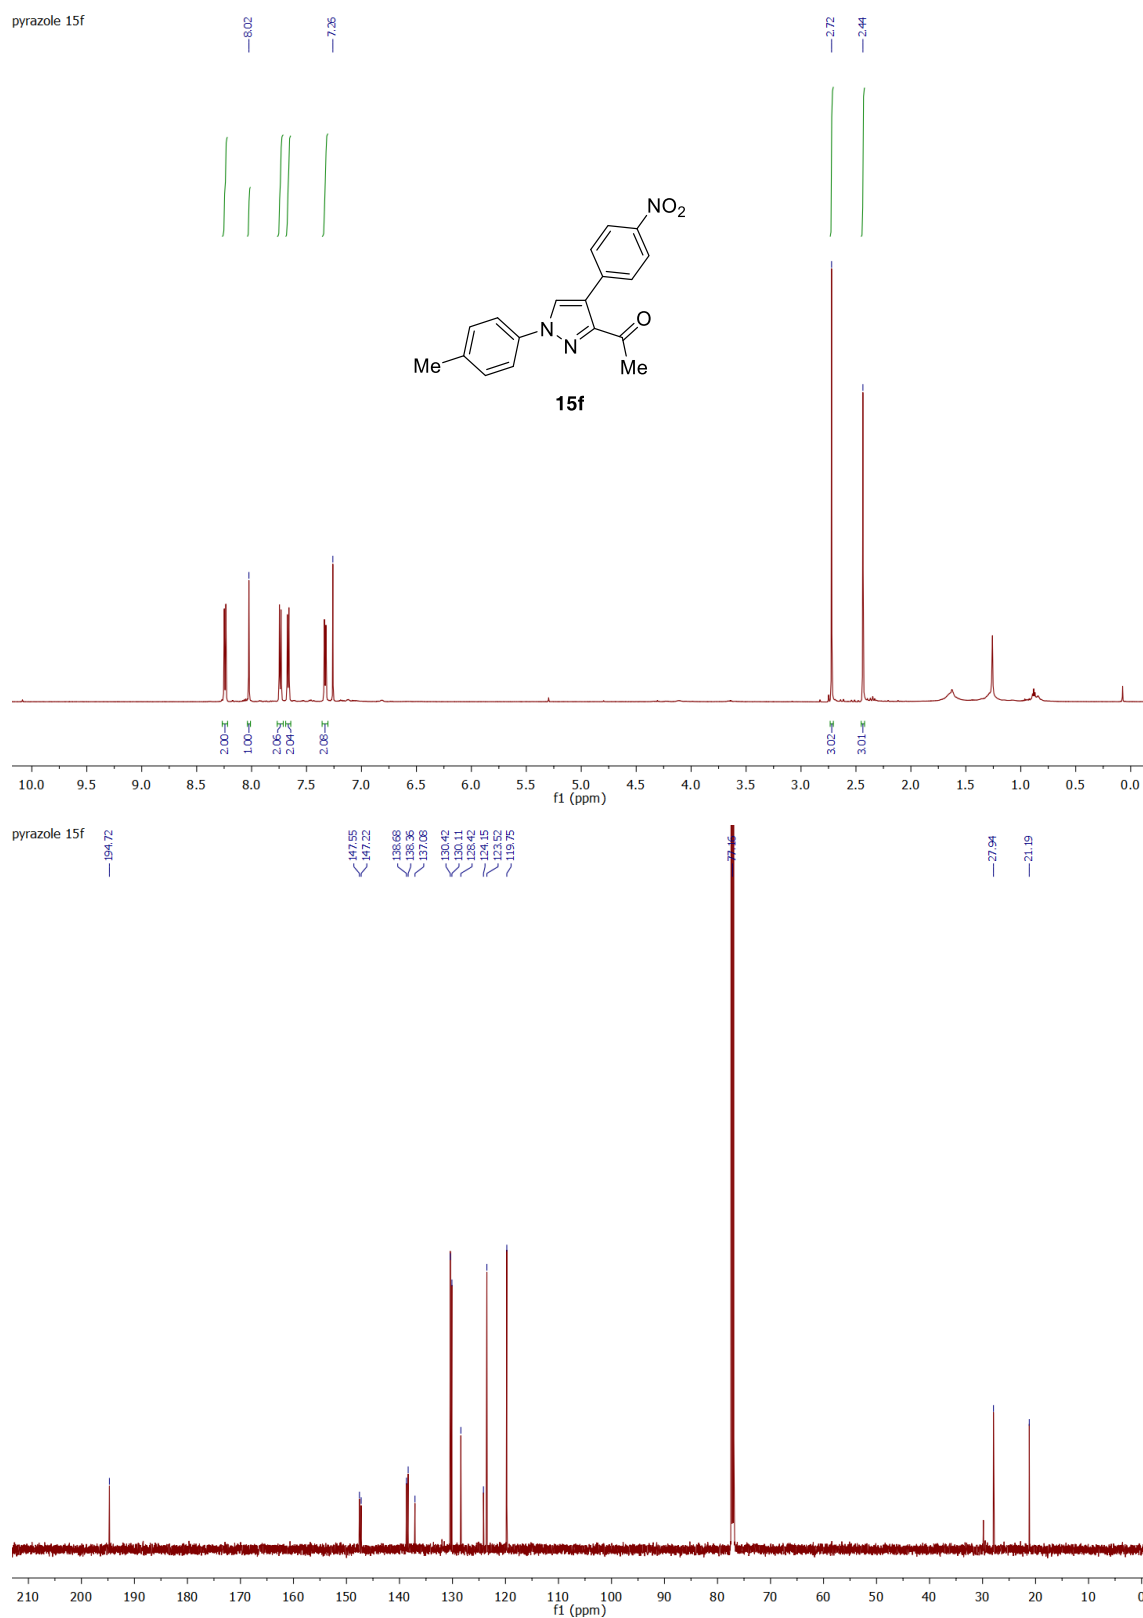

**Figure S19.** <sup>1</sup>H NMR (600 MHz, CDCl<sub>3</sub>) and <sup>13</sup>C NMR (151 MHz, CDCl<sub>3</sub>) spectra for compound **15f**.

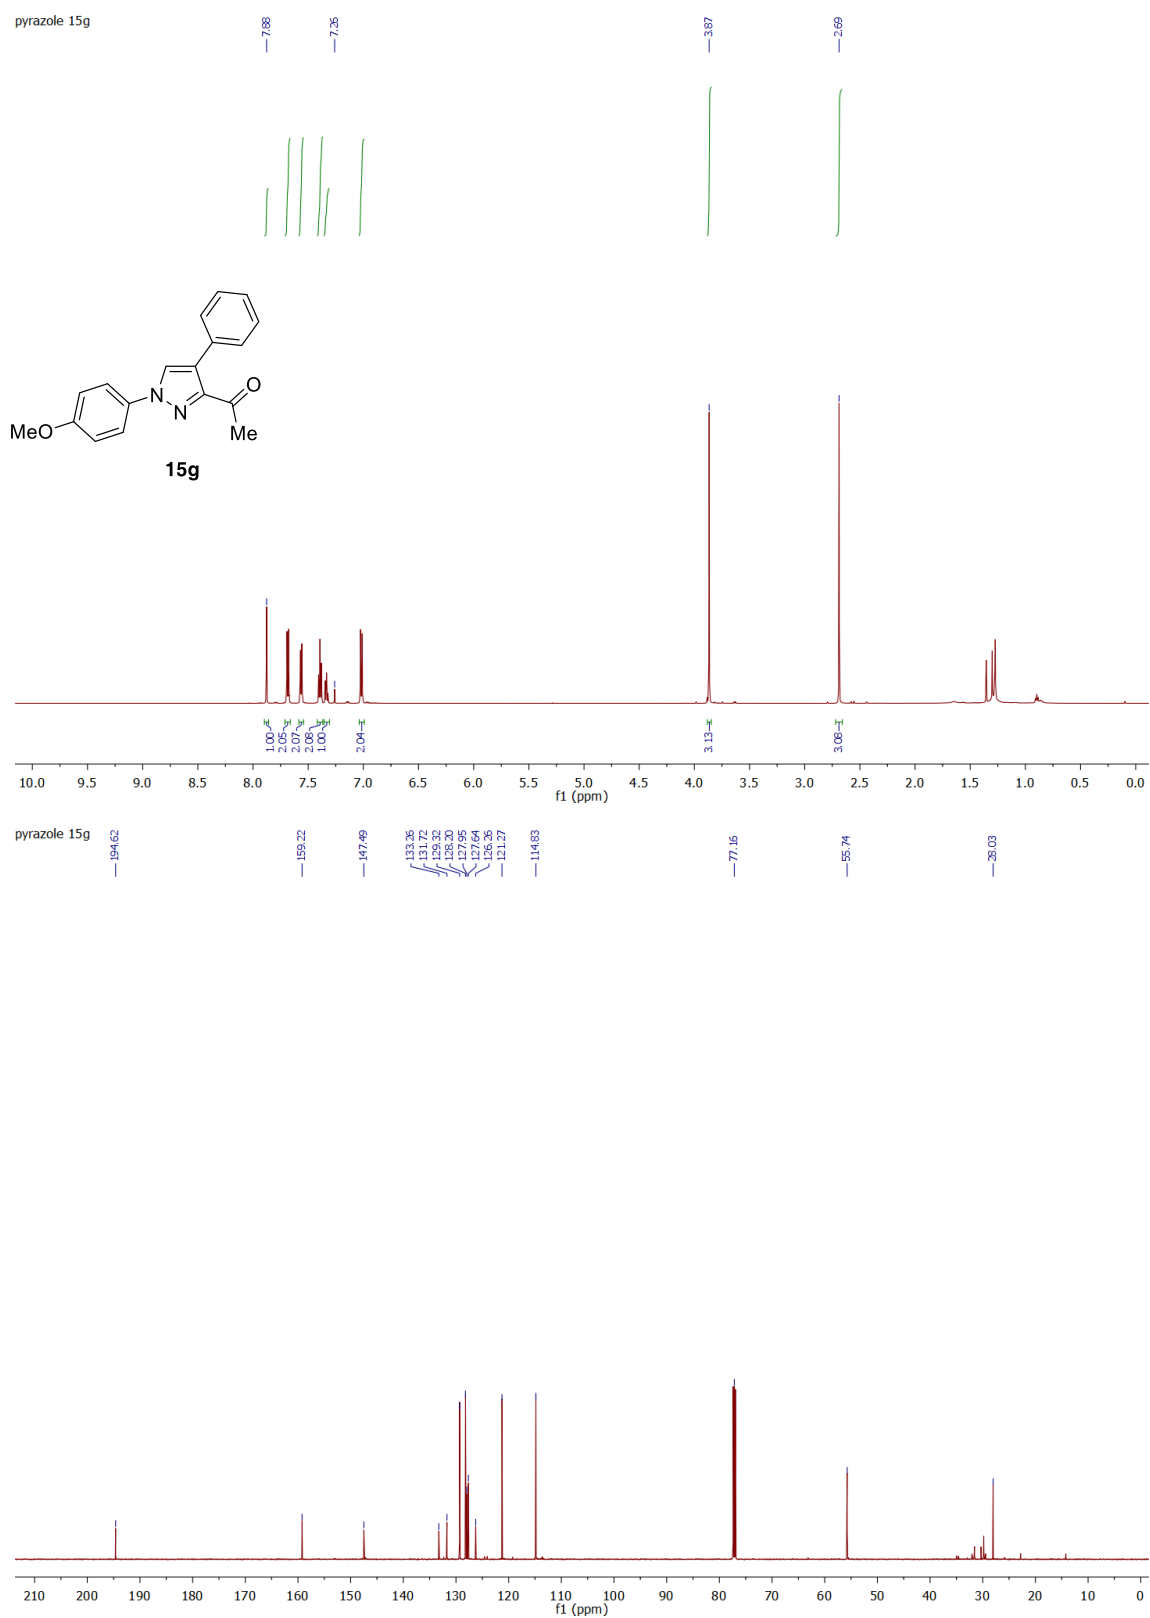

**Figure S20.** <sup>1</sup>H NMR (600 MHz, CDCl<sub>3</sub>) and <sup>13</sup>C NMR (151 MHz, CDCl<sub>3</sub>) spectra for compound **15g**.

pyrazoline 6'a

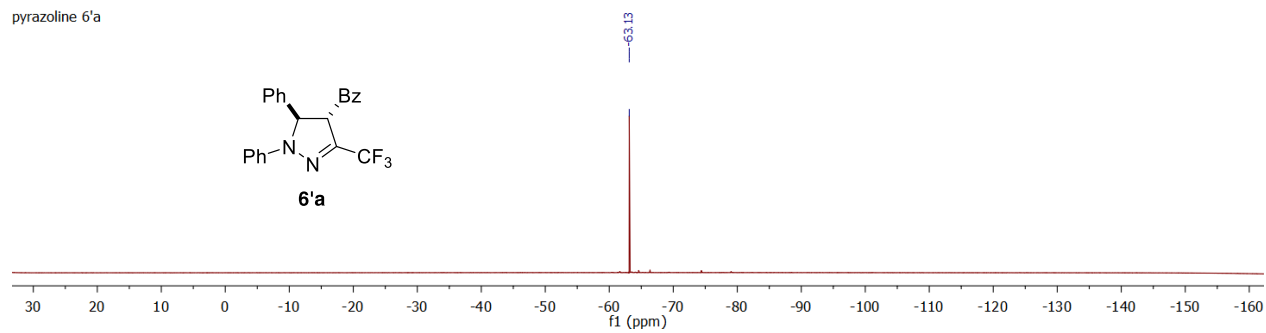

pyrazoline 6'b

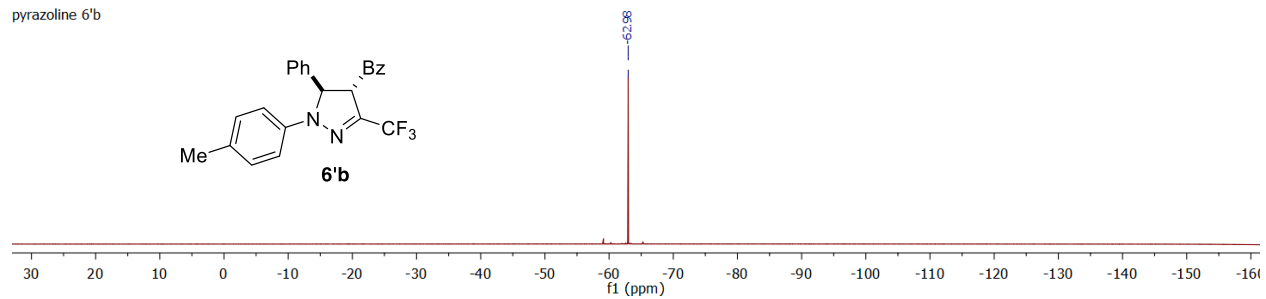

pyrazoline 6l

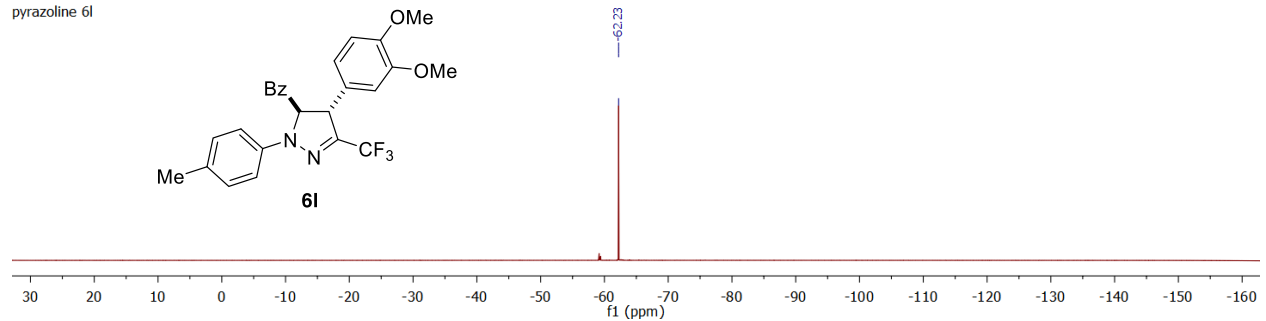

pyrazoline 6m

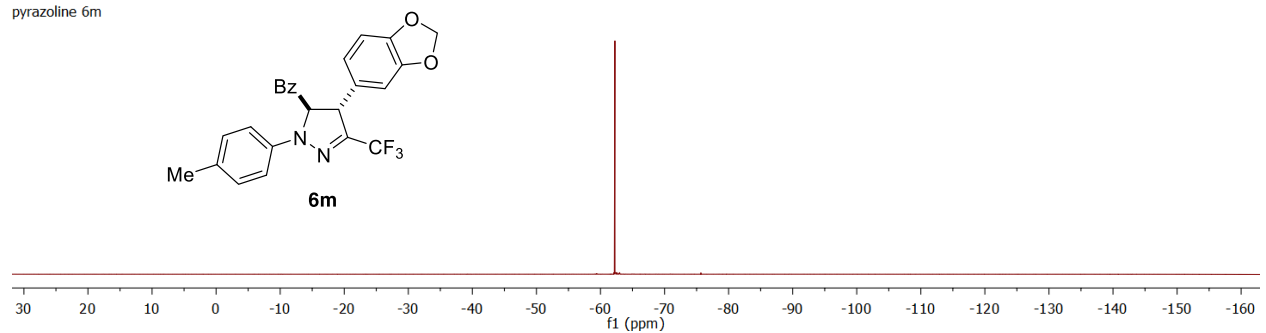

**Figure S21.**  $^{19}\text{F}$  NMR (565 MHz,  $\text{CDCl}_3$ ) spectra for pyrazolines 6'a, 6'b, 6l and 6m.

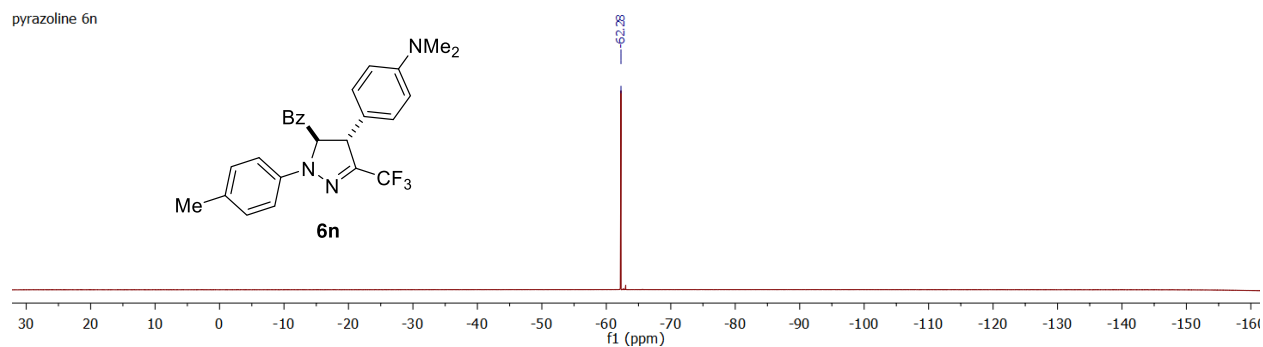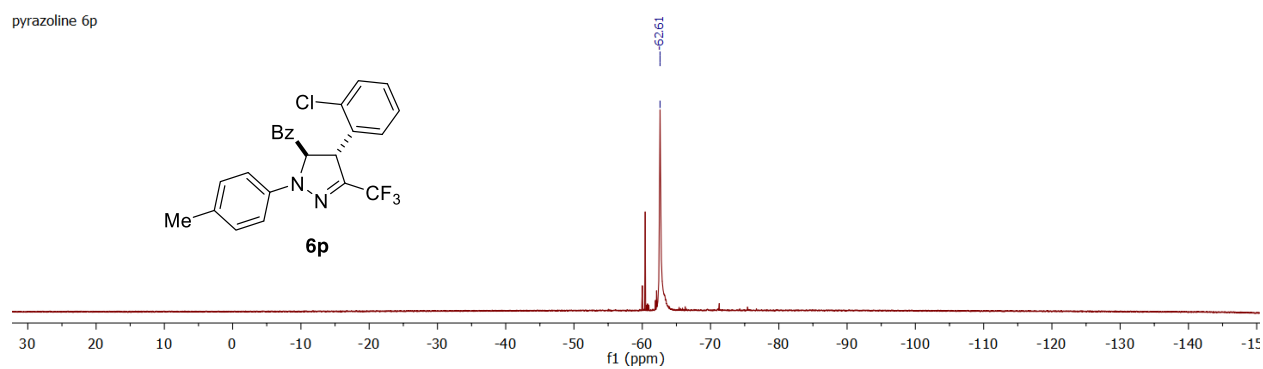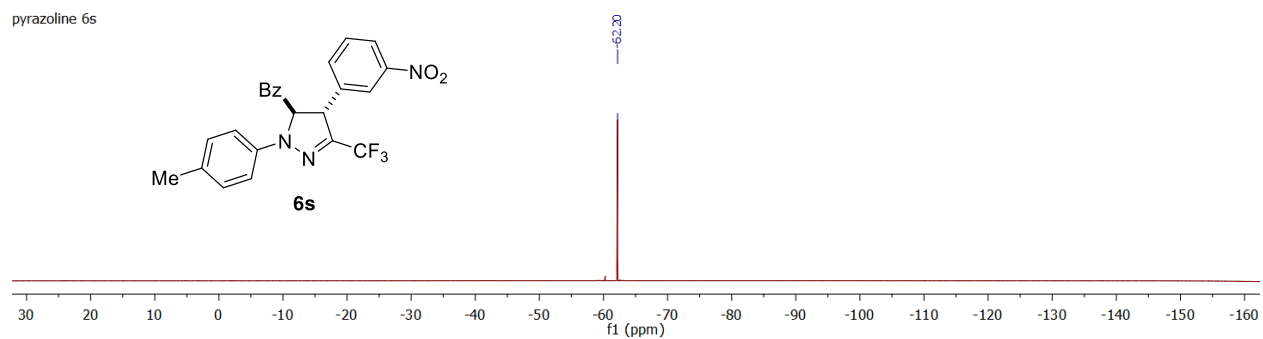

**Figure S22.**  $^{19}\text{F}$  NMR (565 MHz,  $\text{CDCl}_3$ ) spectra for pyrazolines **6n**, **6p** and **6s**.

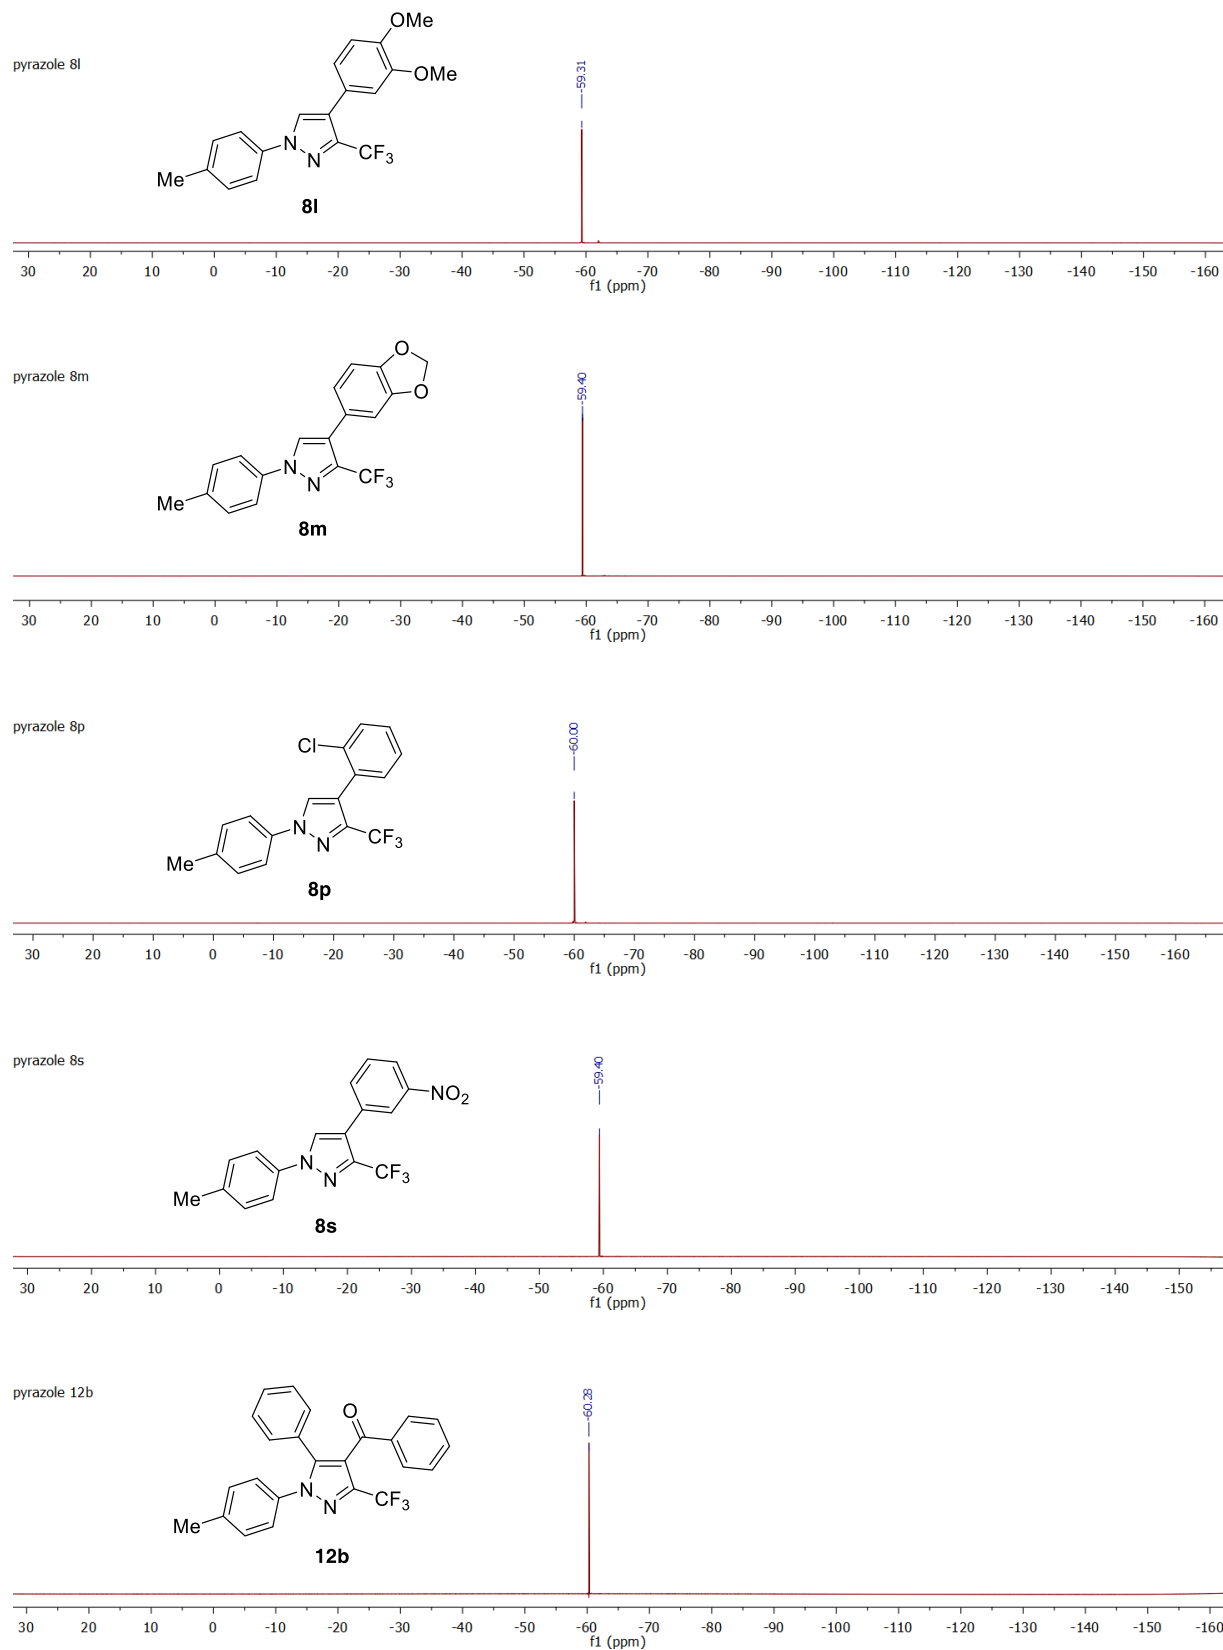

**Figure S23.**  $^{19}\text{F}$  NMR (565 MHz,  $\text{CDCl}_3$ ) spectra for pyrazoles **8l**, **8m**, **8p**, **8s** and **12b**.
